# Supplementary material for: Photosynthesis without β-carotene
Source: eLife journal article supplement (doi:10.7554/elife.58984), 2020-09-25
Supplement: supp [file elife-58984-supp-v1.zip]

Archive with 17 entries (17 files):
- elife_poa_e58984_Figure_1_figure_supplement_1.pdf
- elife_poa_e58984_Figure_2_figure_supplement_1.pdf
- elife_poa_e58984_Figure_3_figure_supplement_1.pdf
- elife_poa_e58984_Figure_3_figure_supplement_2.pdf
- elife_poa_e58984_Figure_3_figure_supplement_3.pdf
- elife_poa_e58984_Figure_3_figure_supplement_4.pdf
- elife_poa_e58984_Figure_3_figure_supplement_5.pdf
- elife_poa_e58984_Figure_4_figure_supplement_1.pdf
- elife_poa_e58984_Figure_4_figure_supplement_2.pdf
- elife_poa_e58984_Figure_5_figure_supplement_1.pdf
- elife_poa_e58984_Figure_5_figure_supplement_2.pdf
- elife_poa_e58984_Figure_5_figure_supplement_3.pdf
- elife_poa_e58984_Figure_5_figure_supplement_4.pdf
- elife_poa_e58984_Figure_5_figure_supplement_5.pdf
- elife_poa_e58984_Figure_5_figure_supplement_6.pdf
- elife_poa_e58984_Figure_5_figure_supplement_7.pdf
- elife_poa_e58984_Transparent_Reporting_File.docx
