# Supplementary figures and images for: Photosynthesis without β-carotene
Source: eLife journal article supplement (doi:10.7554/elife.58984), 2020-09-25

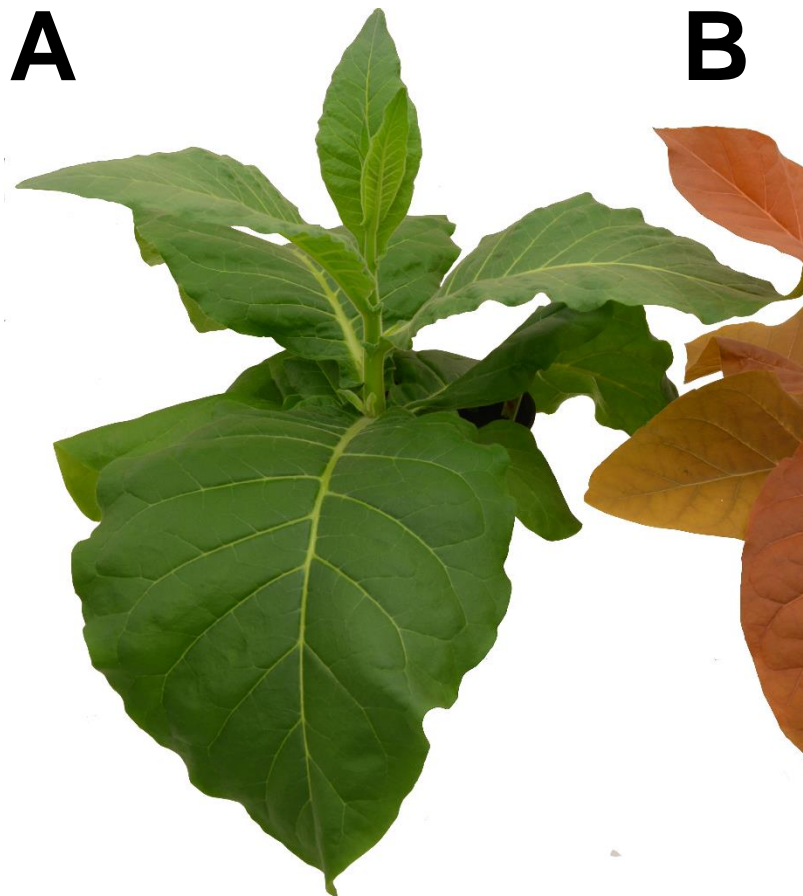

WT 5 weeks

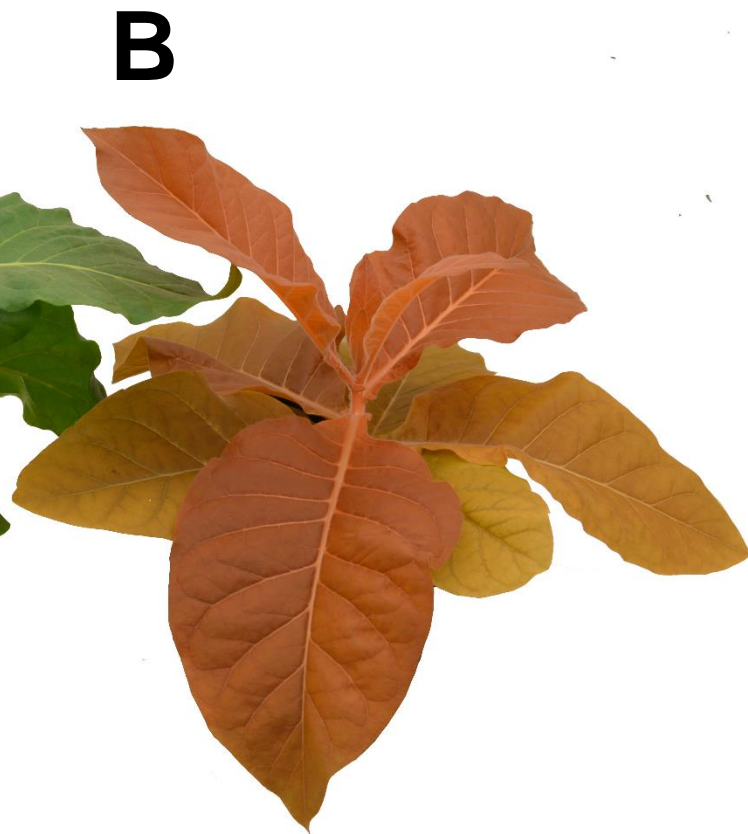

Asta 14 weeks

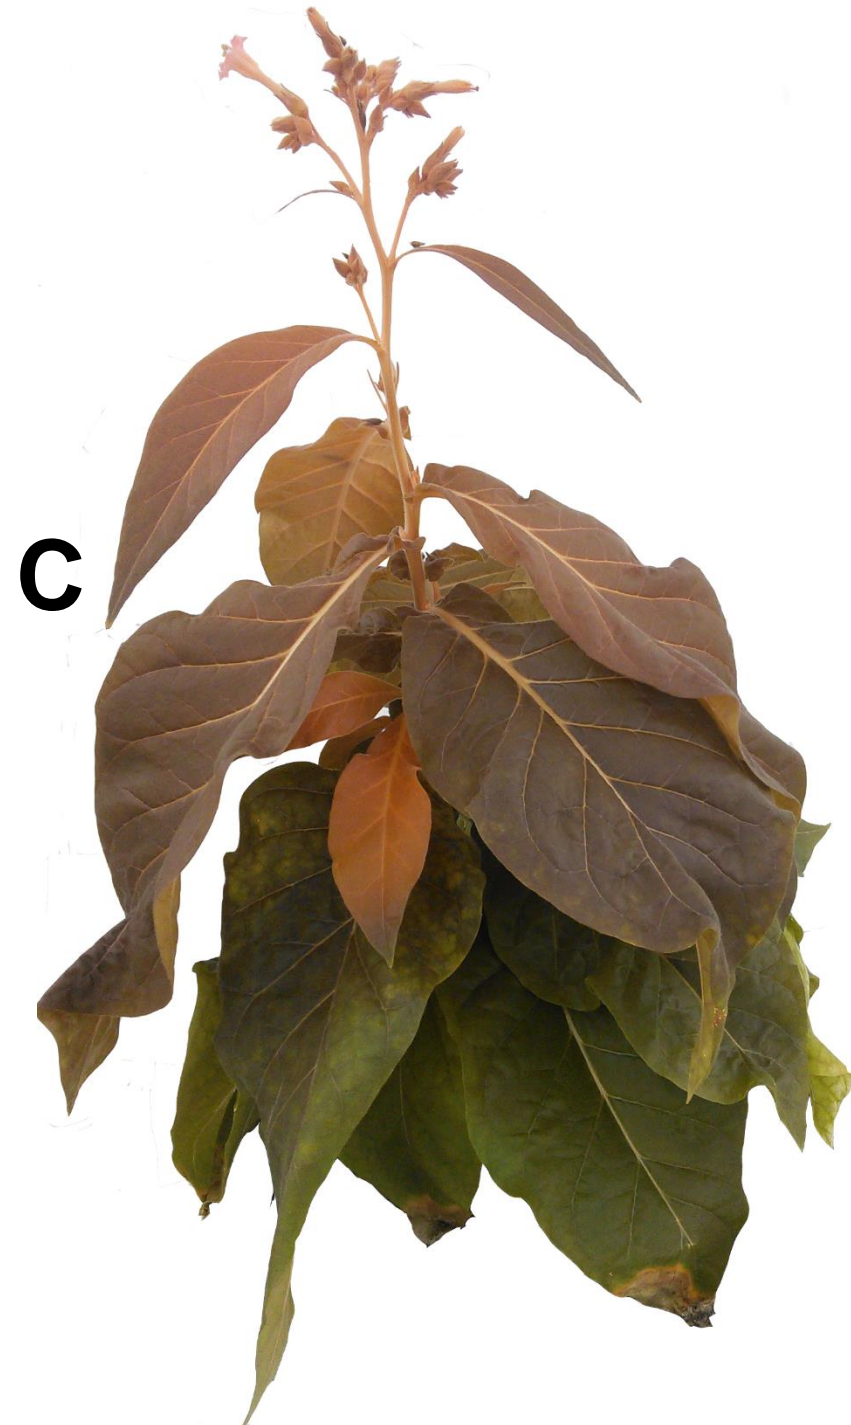

Asta 28 weeks

Supplement: supp [file elife-58984-supp-v1.zip]

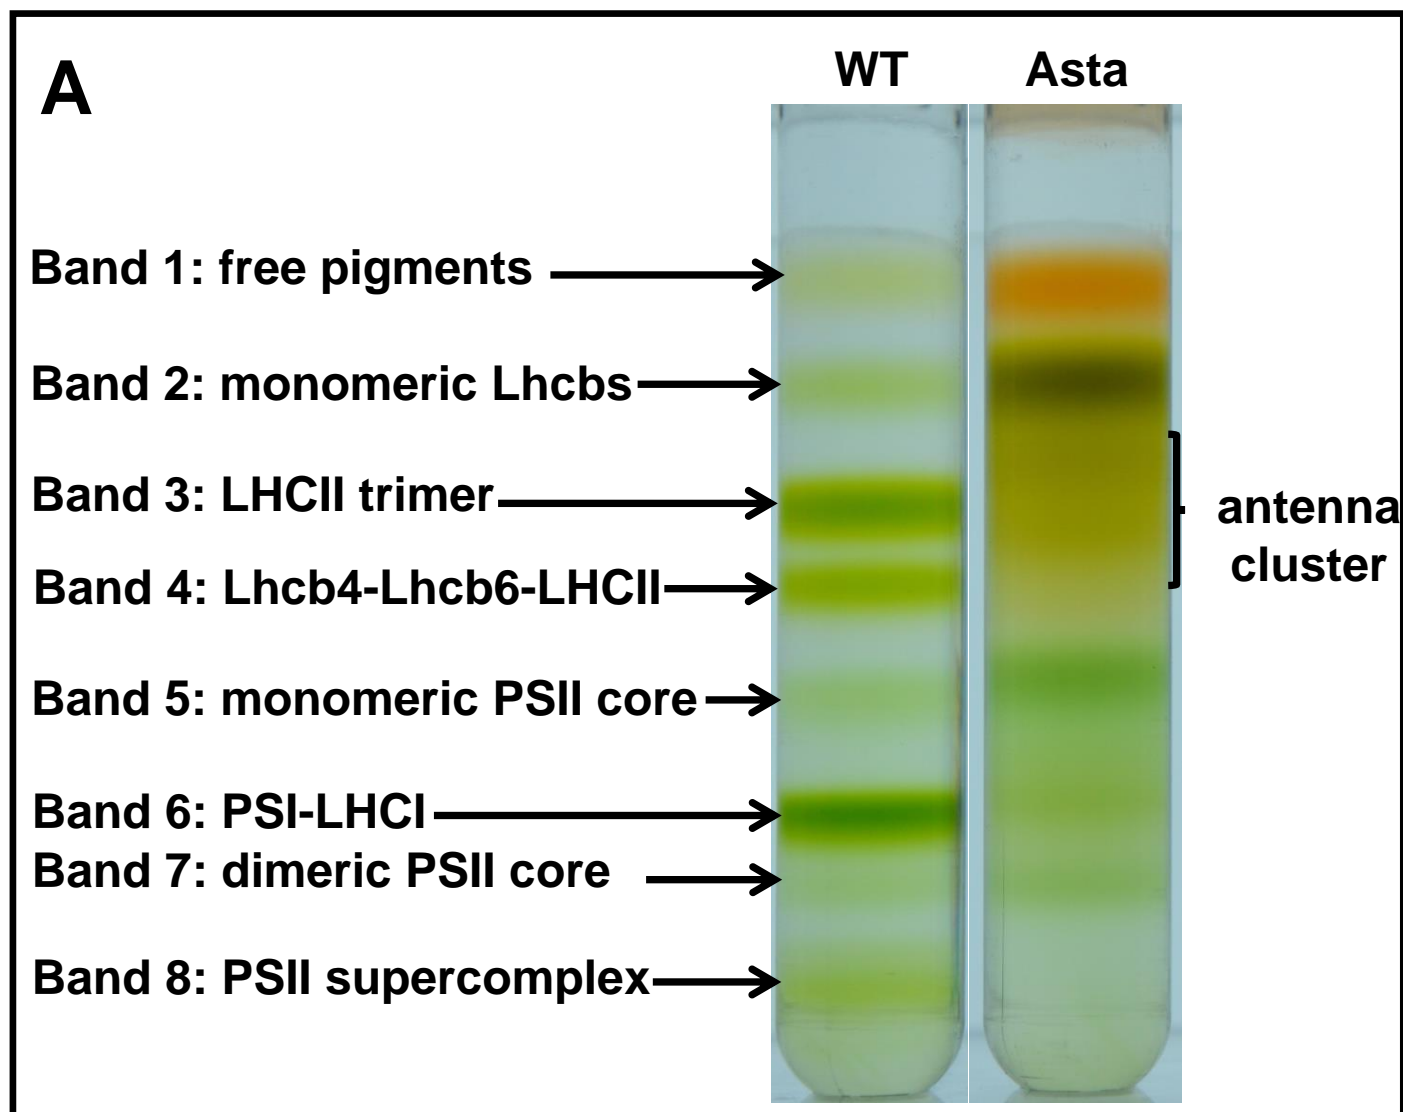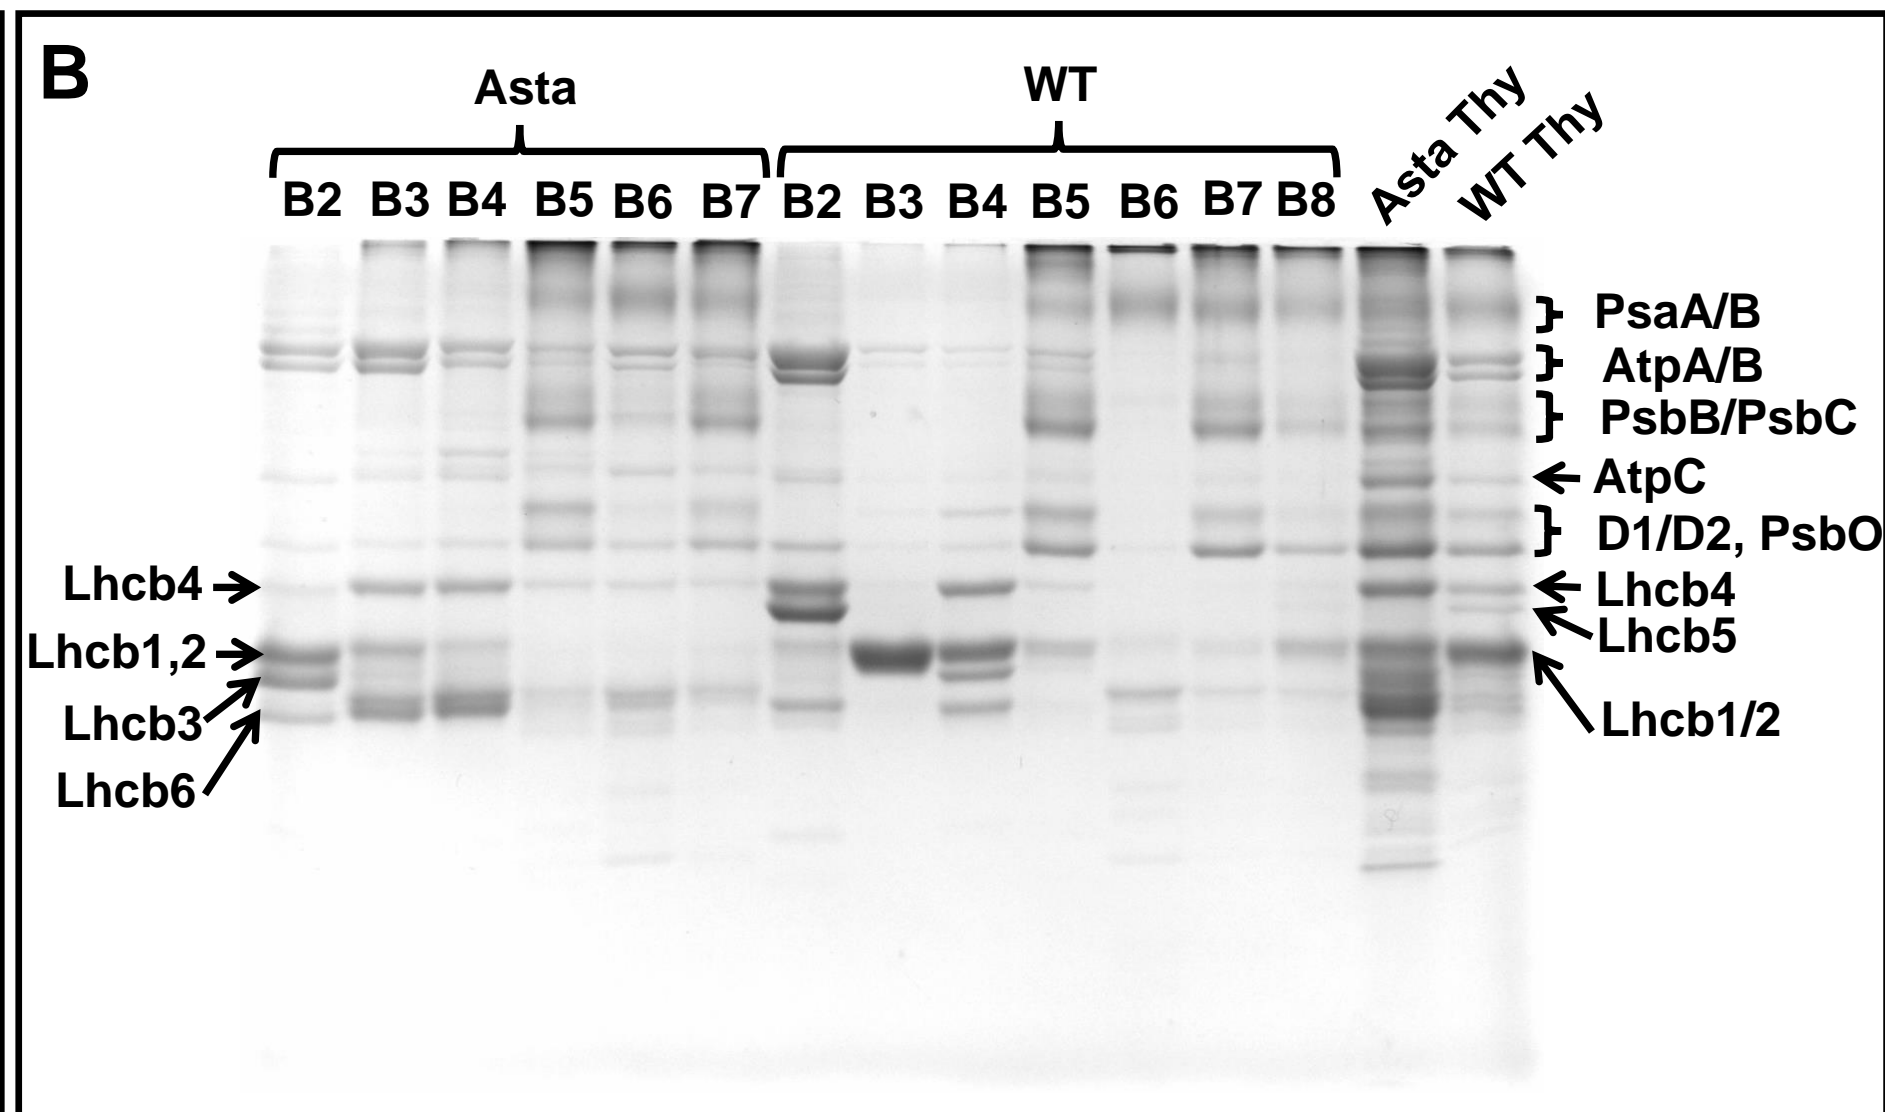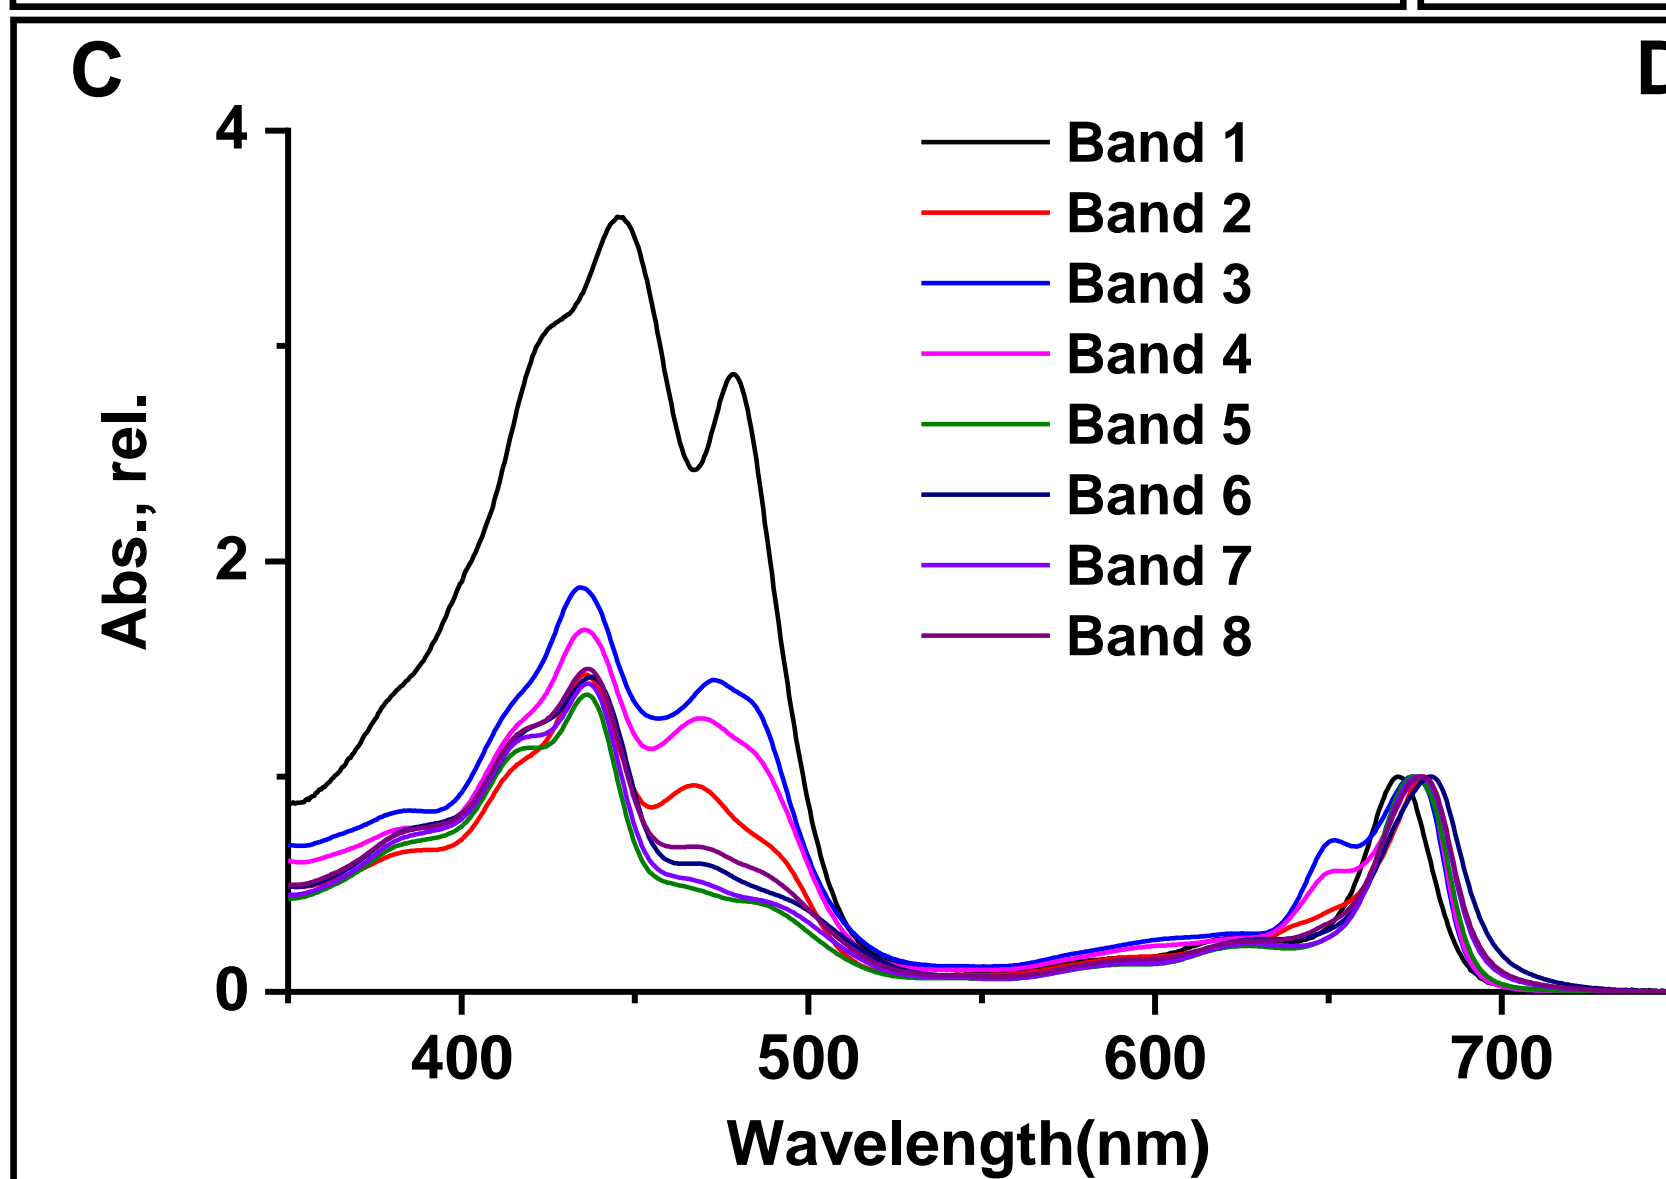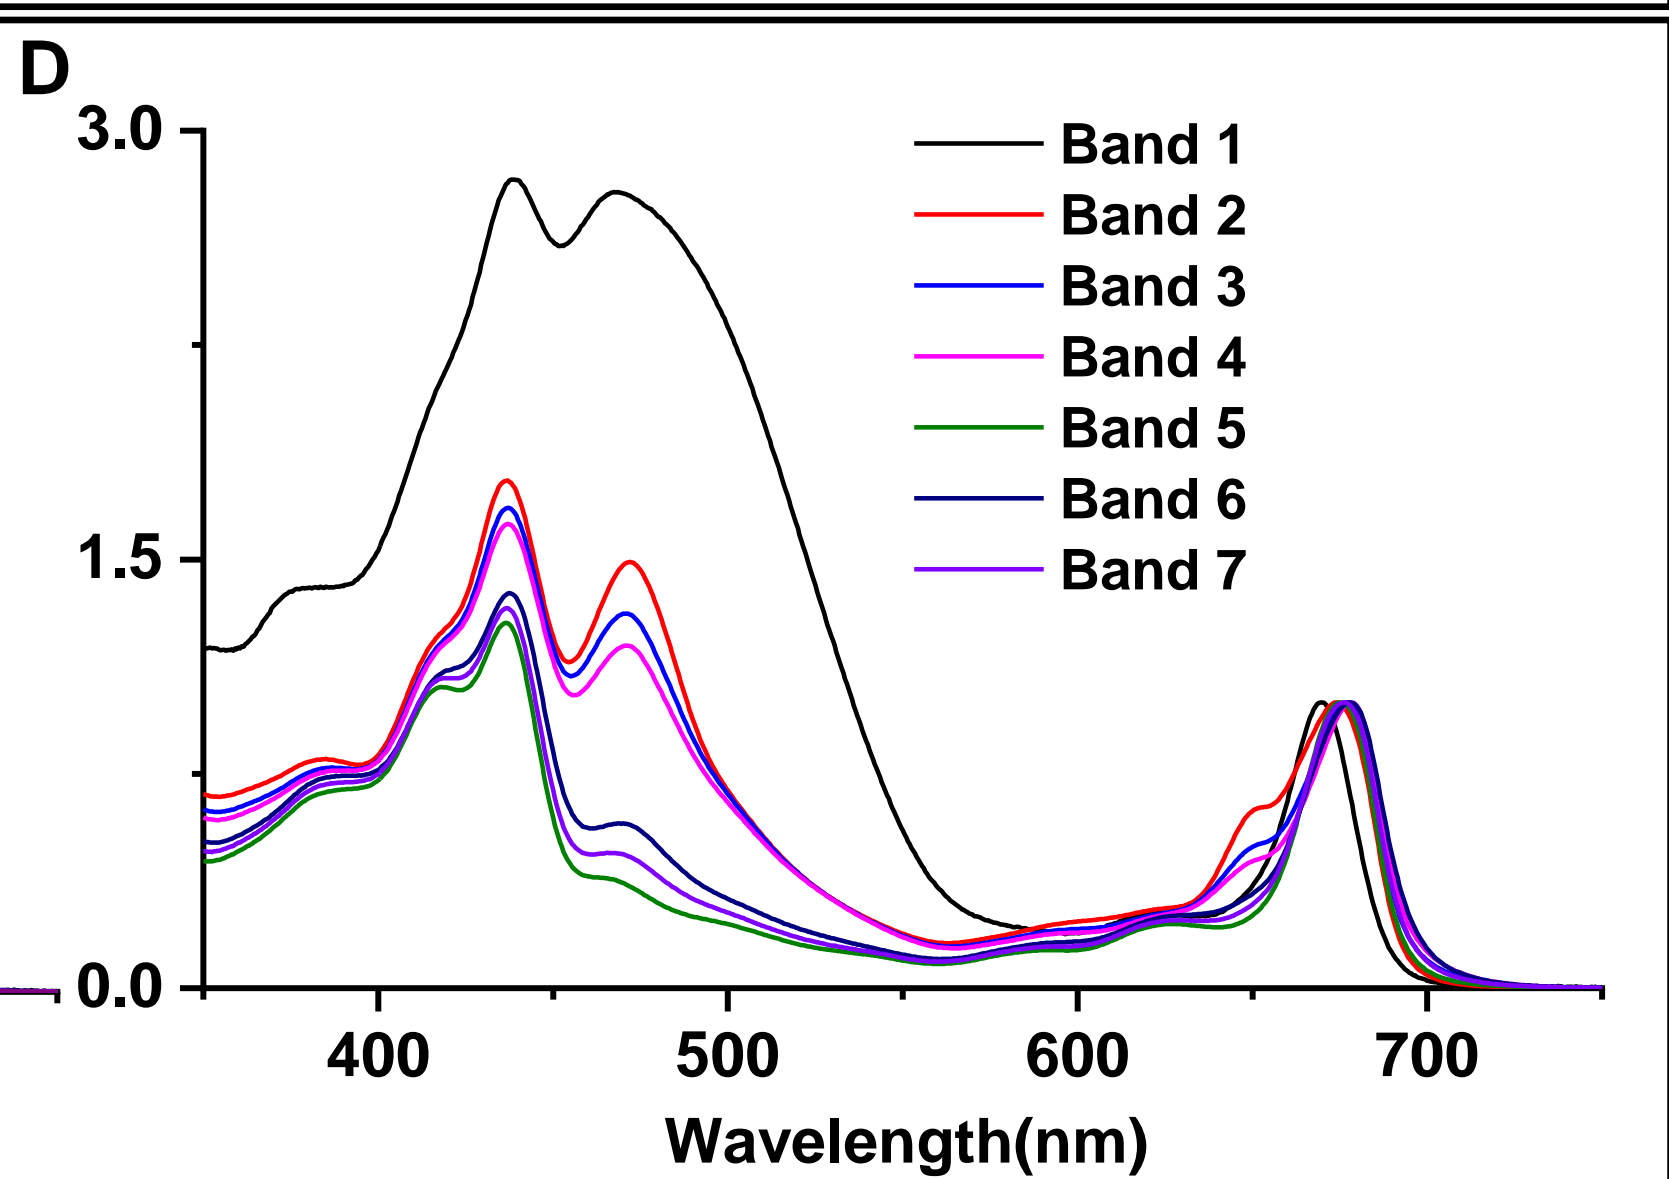

Supplement: supp [file elife-58984-supp-v1.zip › elife_poa_e58984_Figure_3_figure_supplement_1.pdf]

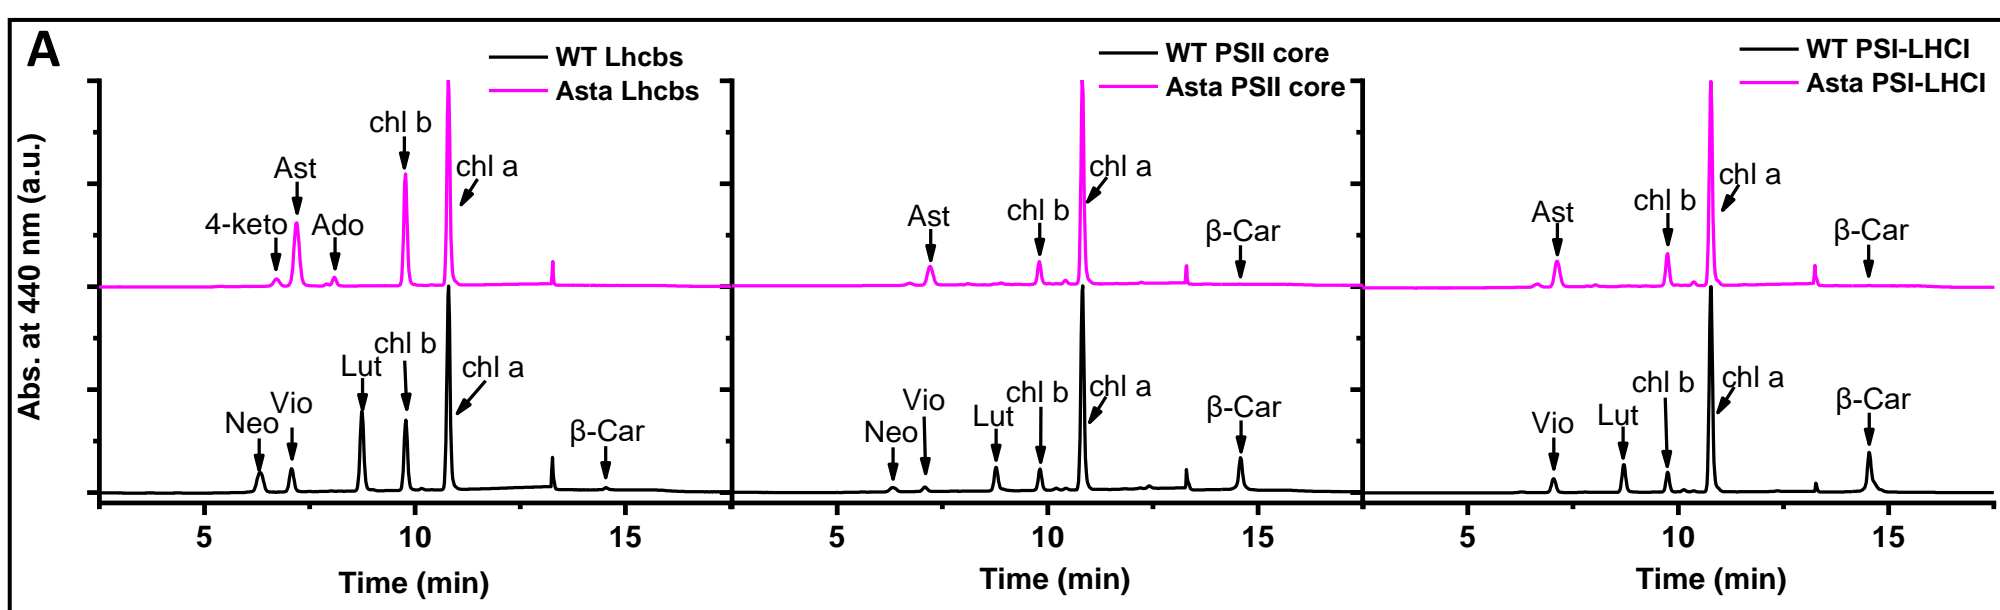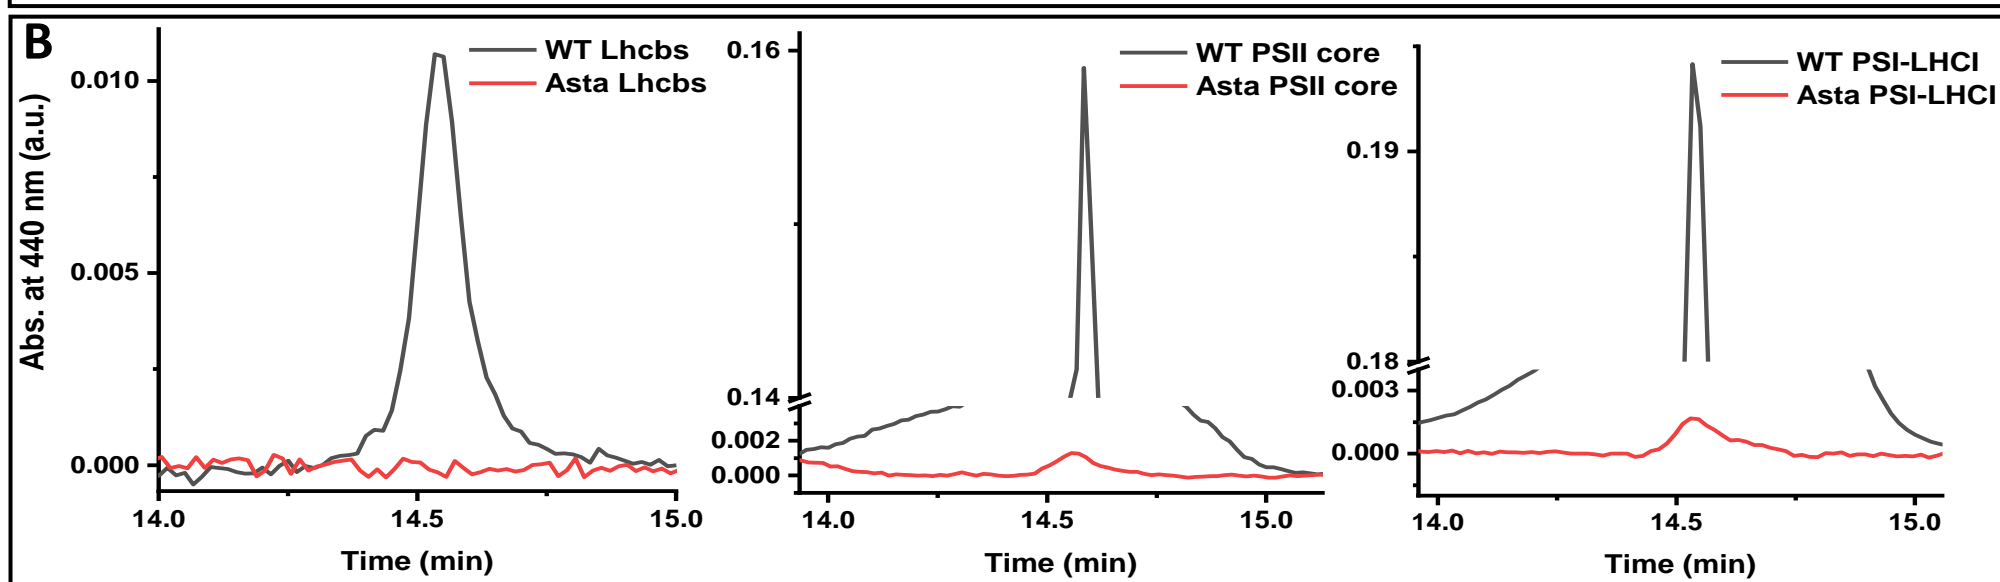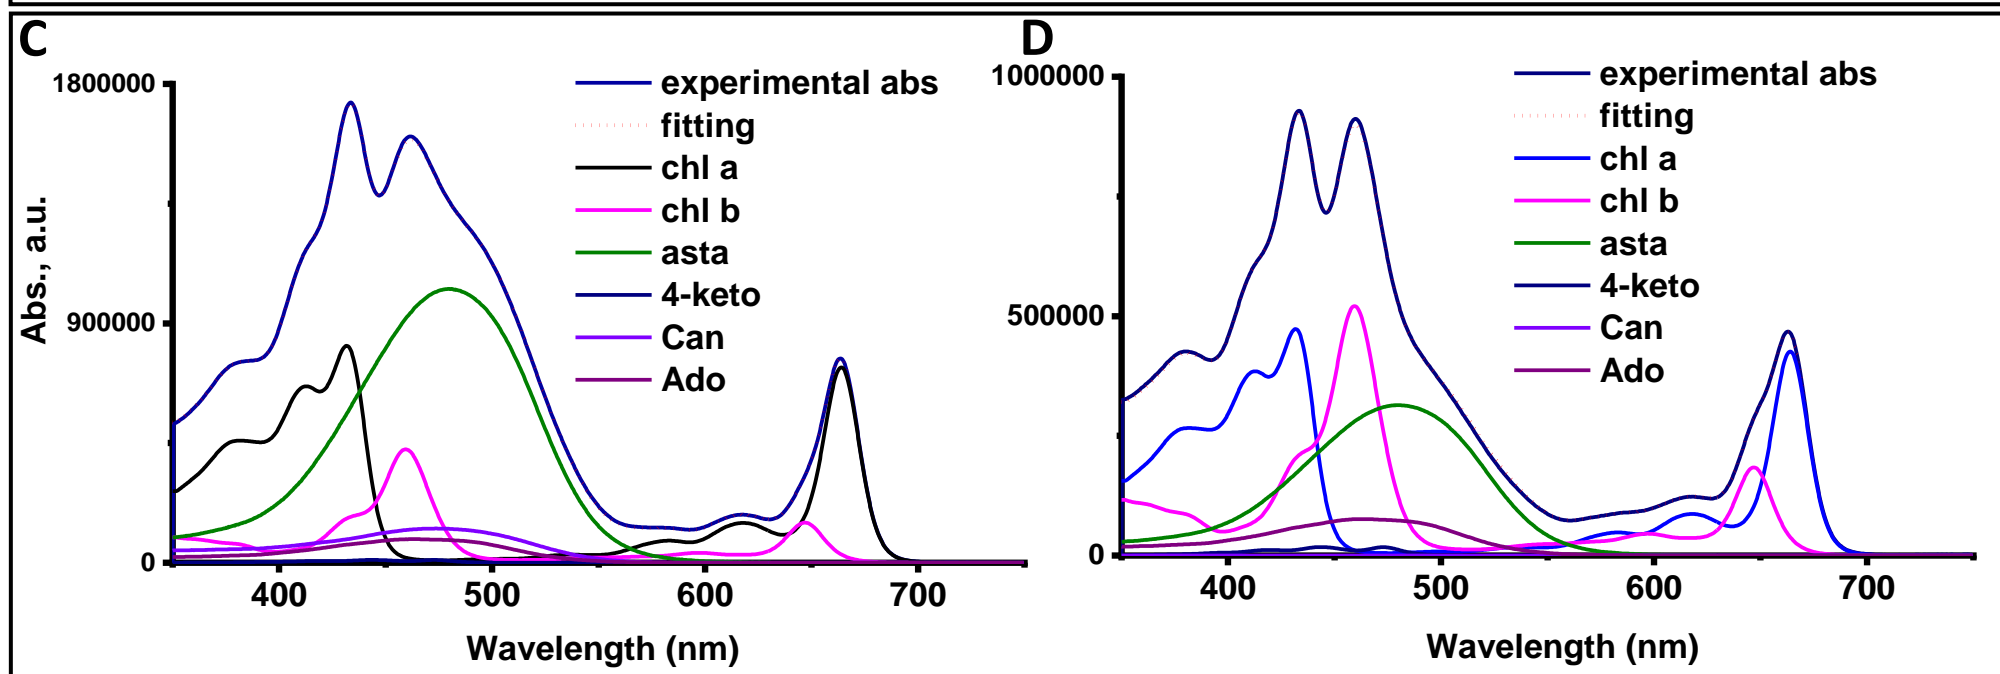

Supplement: supp [file elife-58984-supp-v1.zip › elife_poa_e58984_Figure_3_figure_supplement_2.pdf]

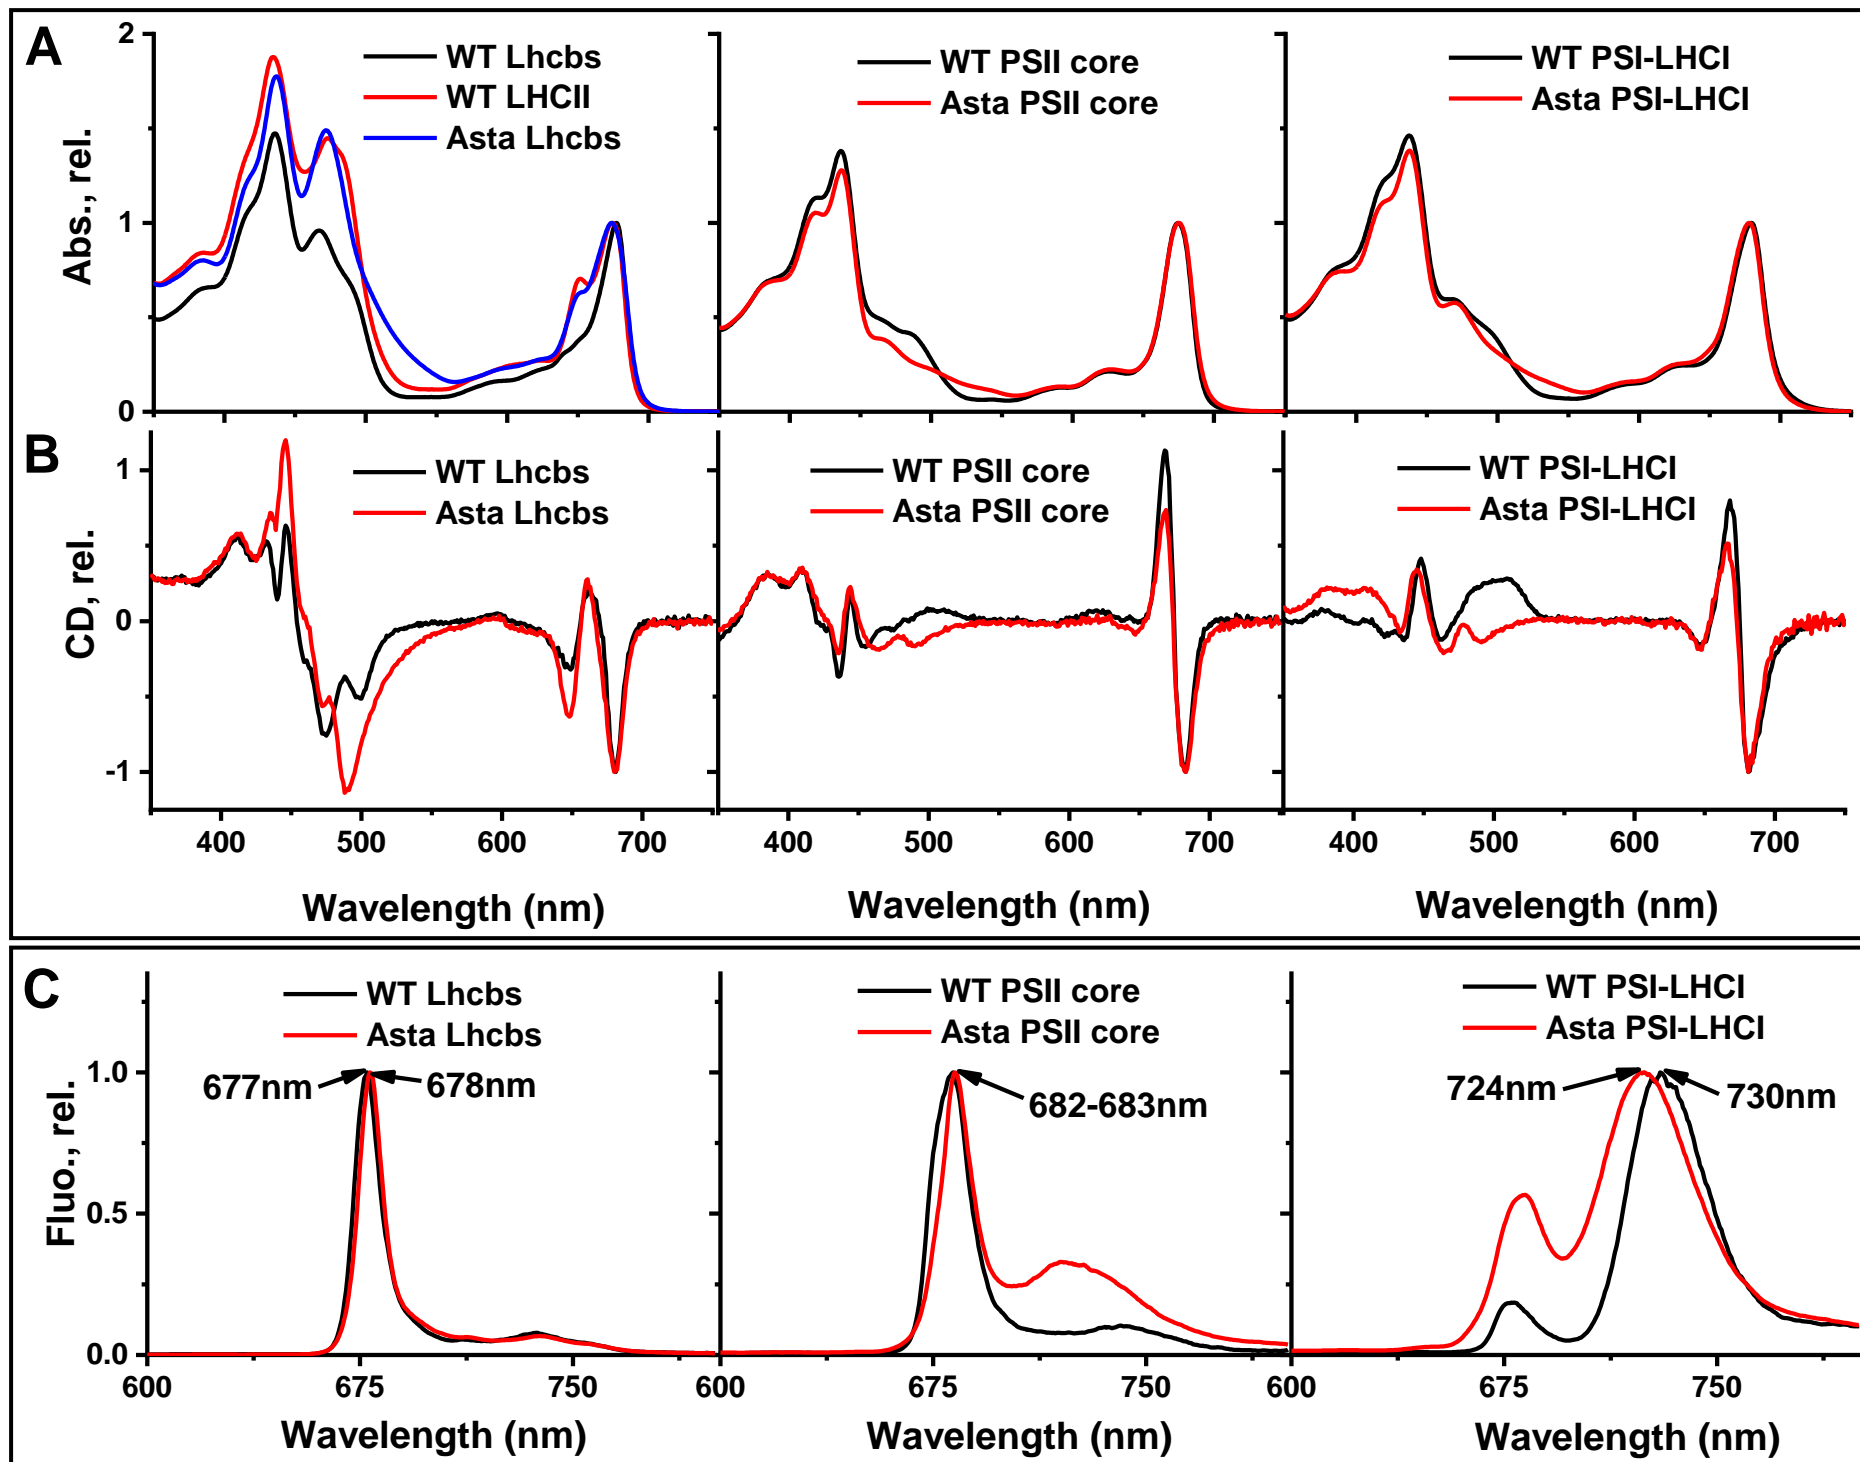

Supplement: supp [file elife-58984-supp-v1.zip › elife_poa_e58984_Figure_3_figure_supplement_3.pdf]

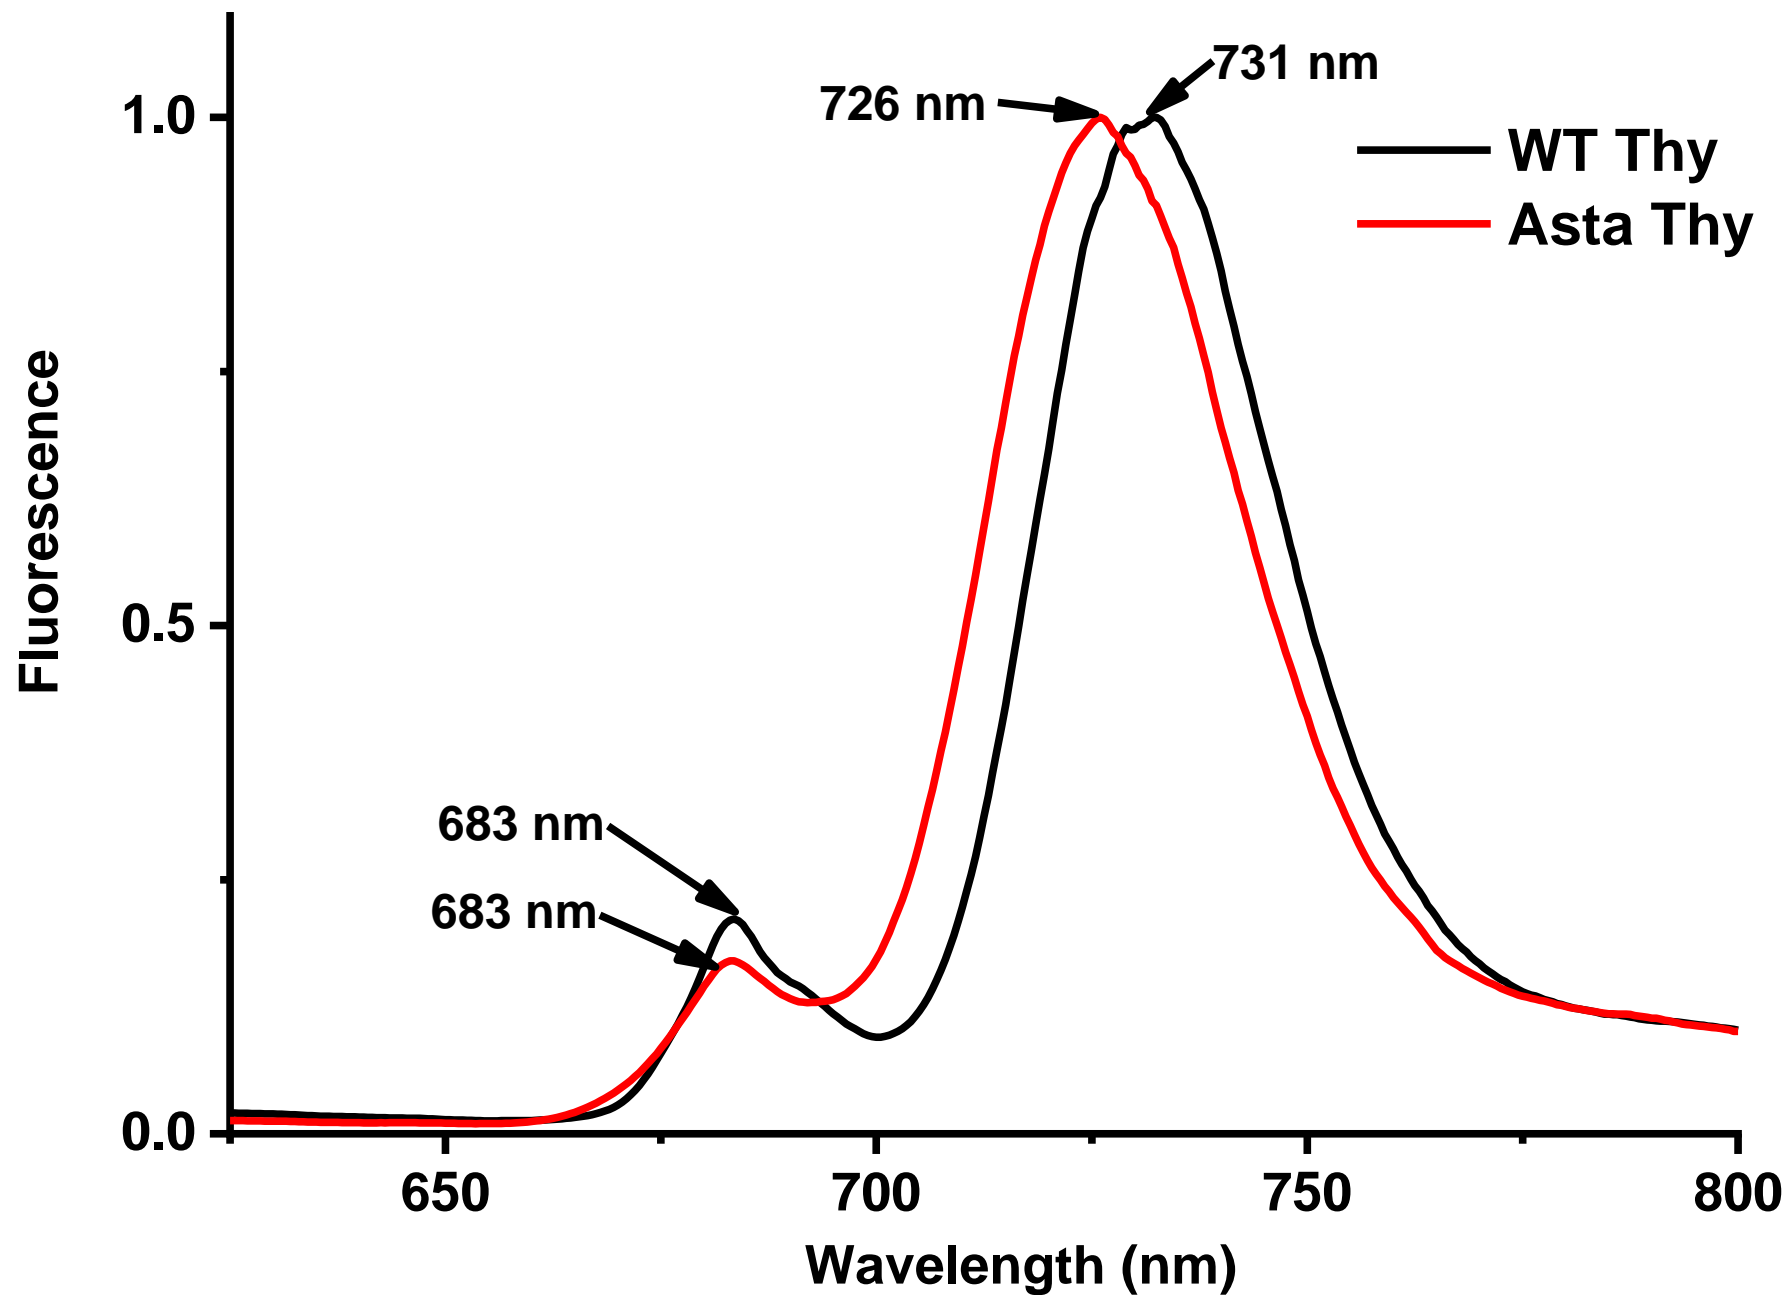

Supplement: supp [file elife-58984-supp-v1.zip › elife_poa_e58984_Figure_3_figure_supplement_4.pdf]

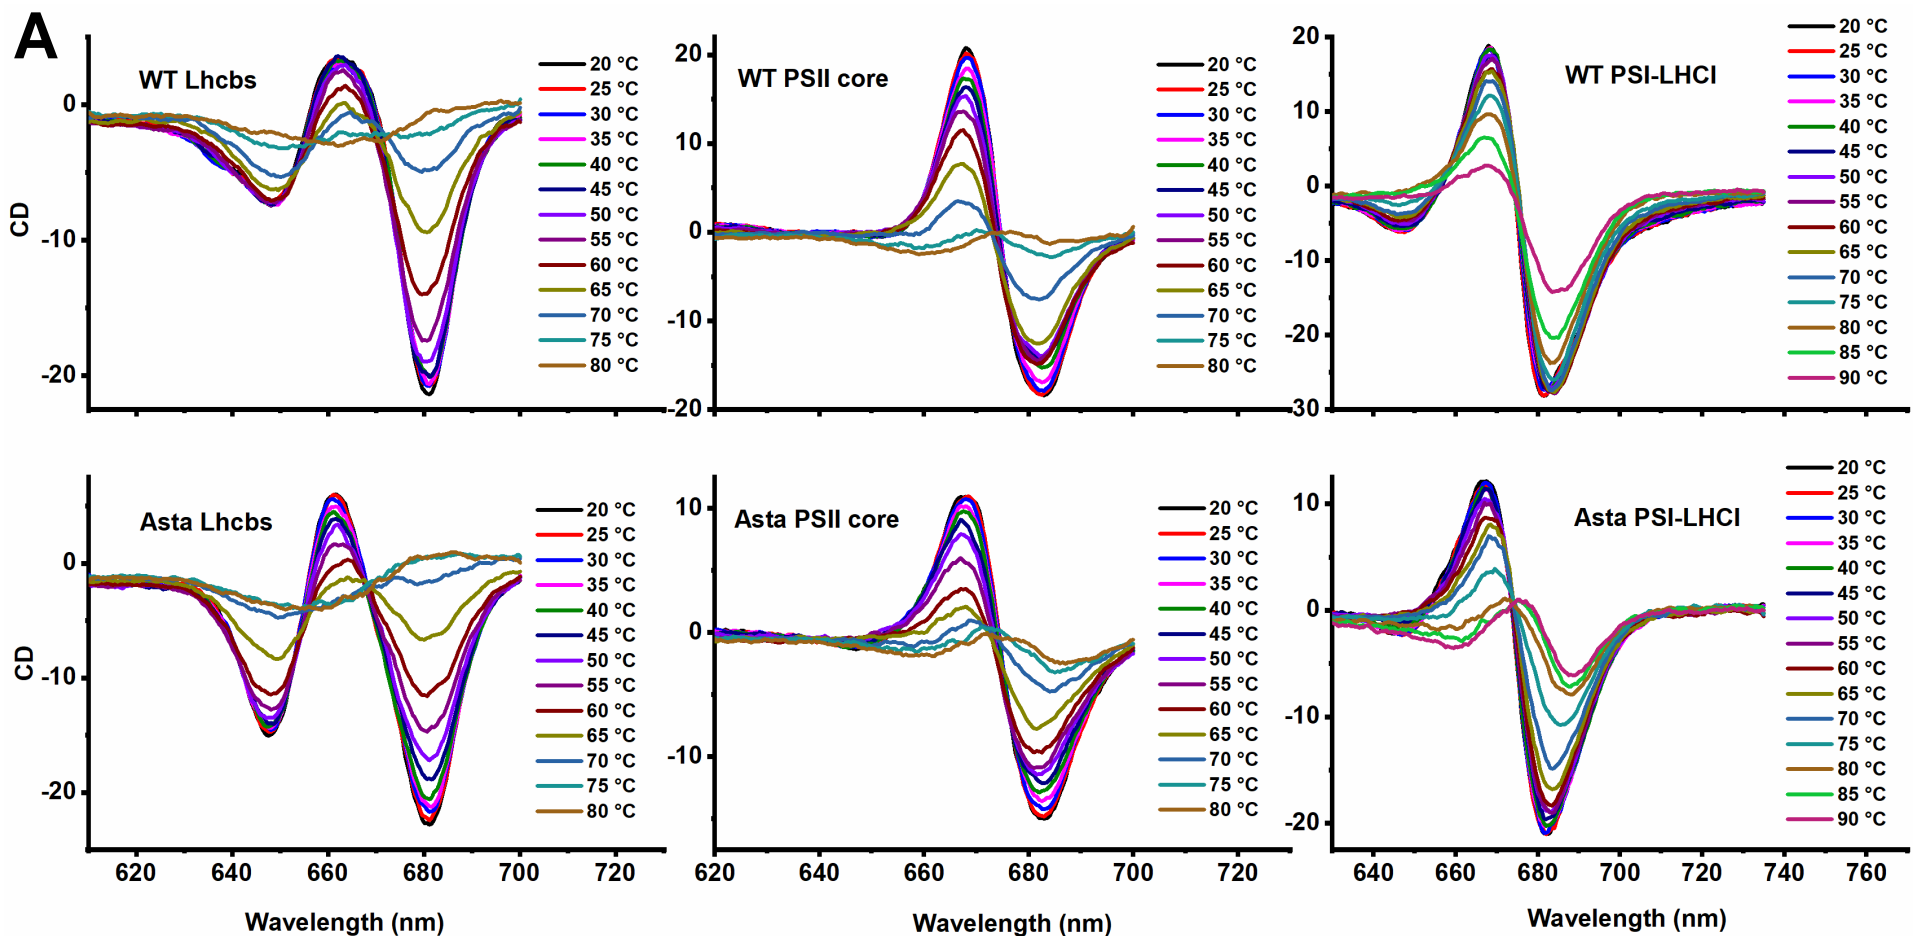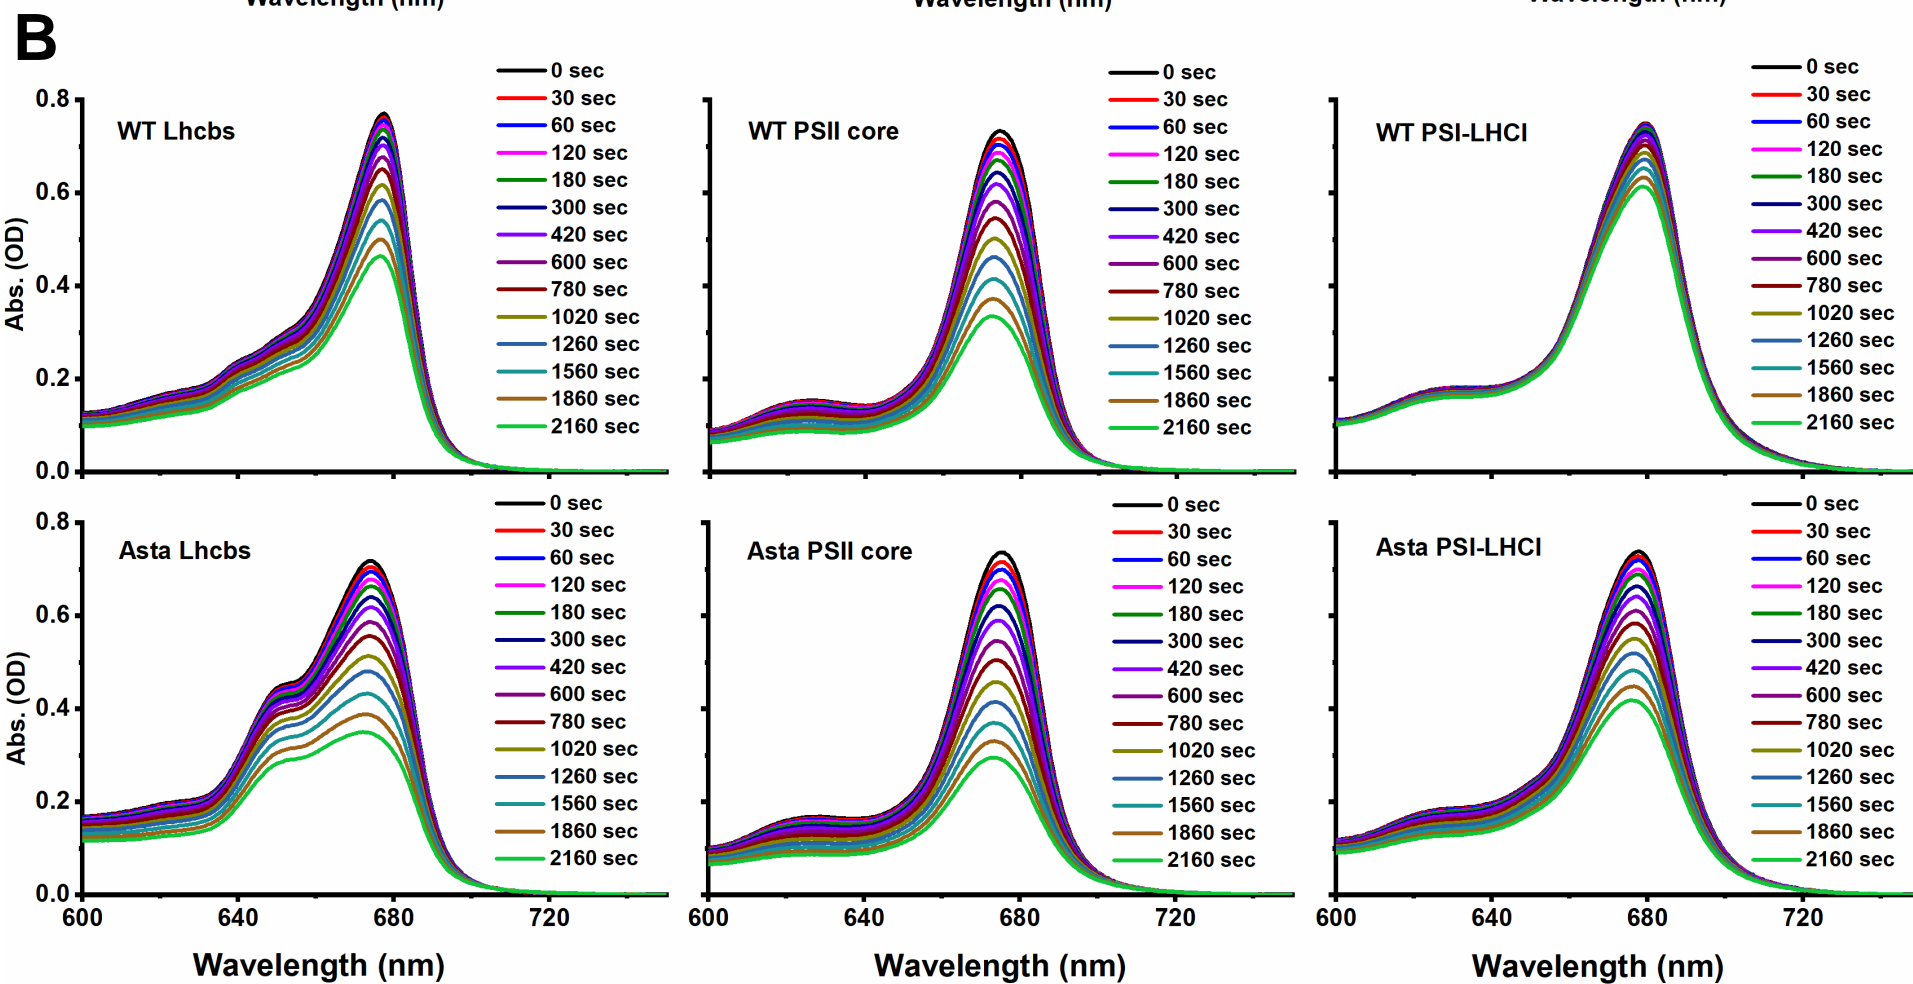

Supplement: supp [file elife-58984-supp-v1.zip › elife_poa_e58984_Figure_3_figure_supplement_5.pdf]

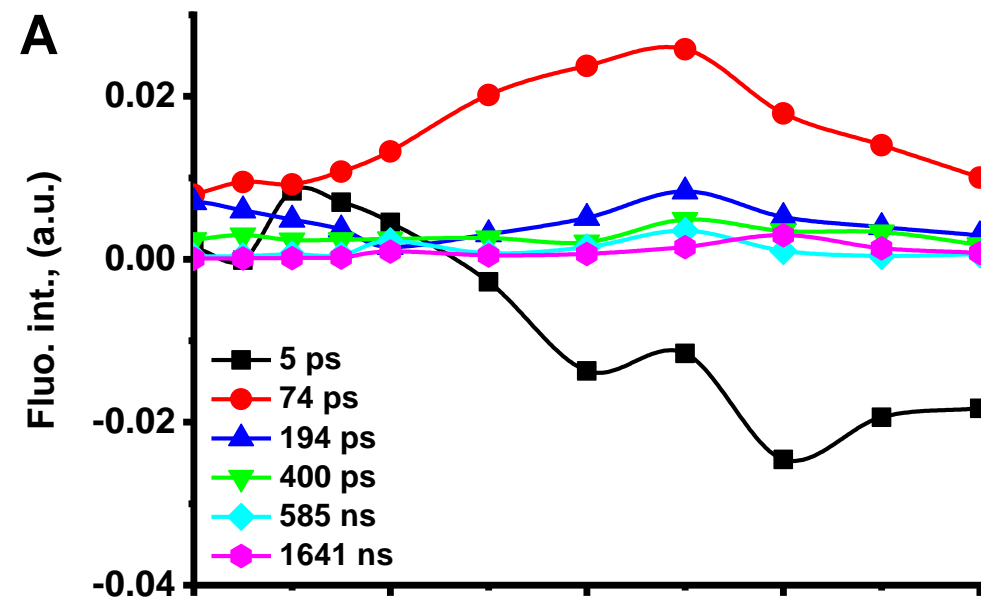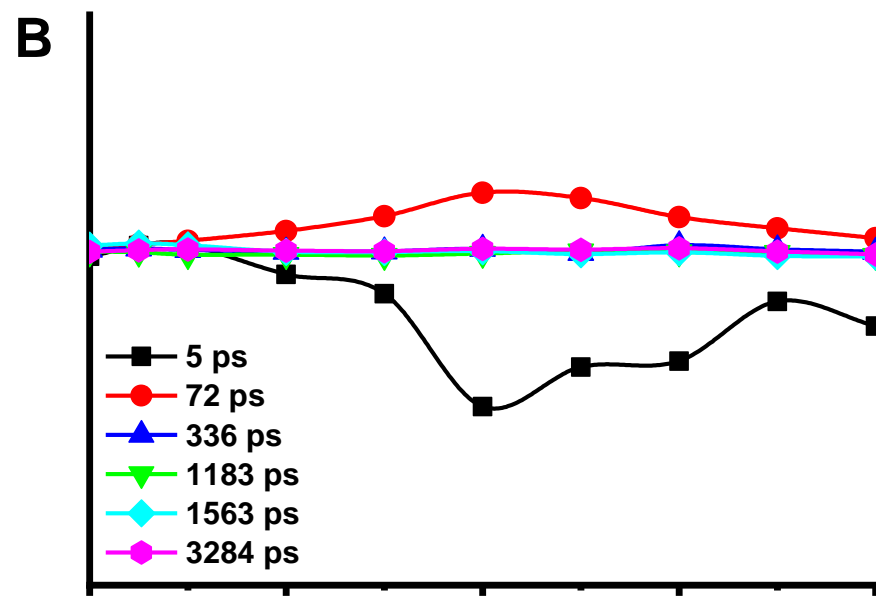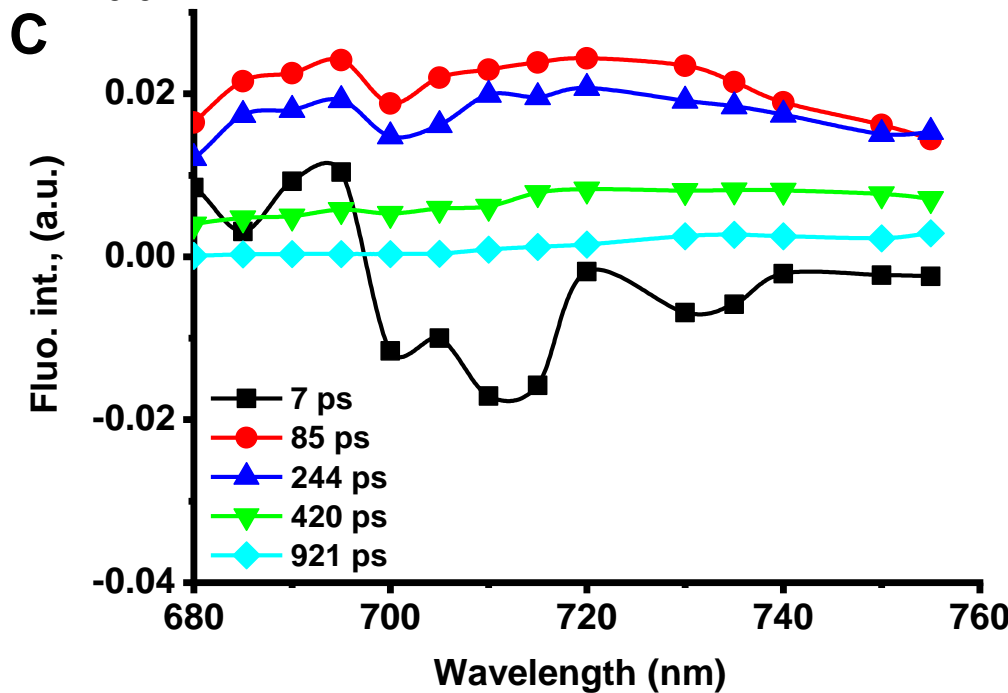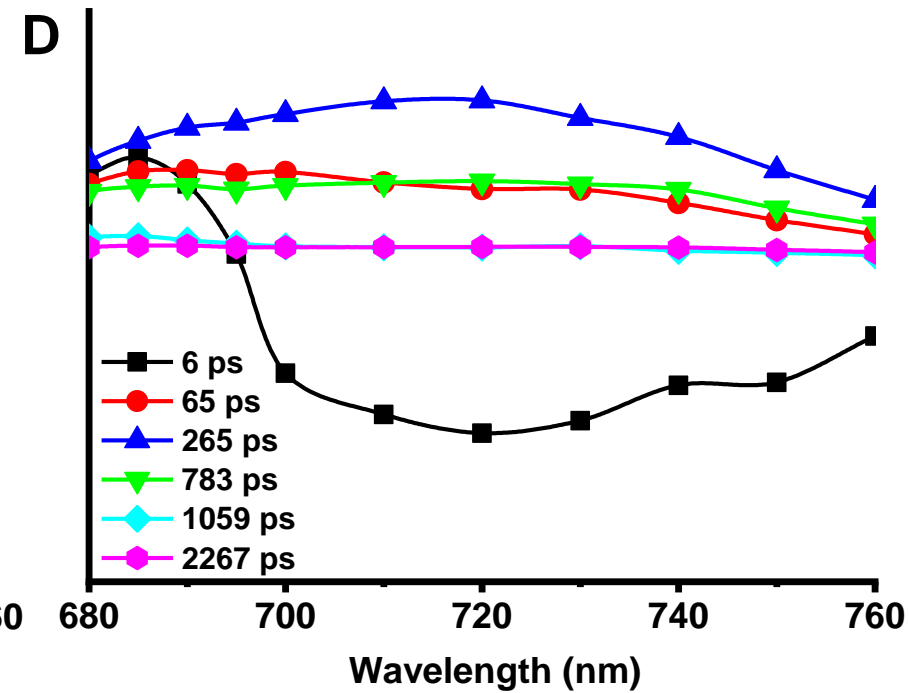

Supplement: supp [file elife-58984-supp-v1.zip › elife_poa_e58984_Figure_4_figure_supplement_1.pdf]

**A**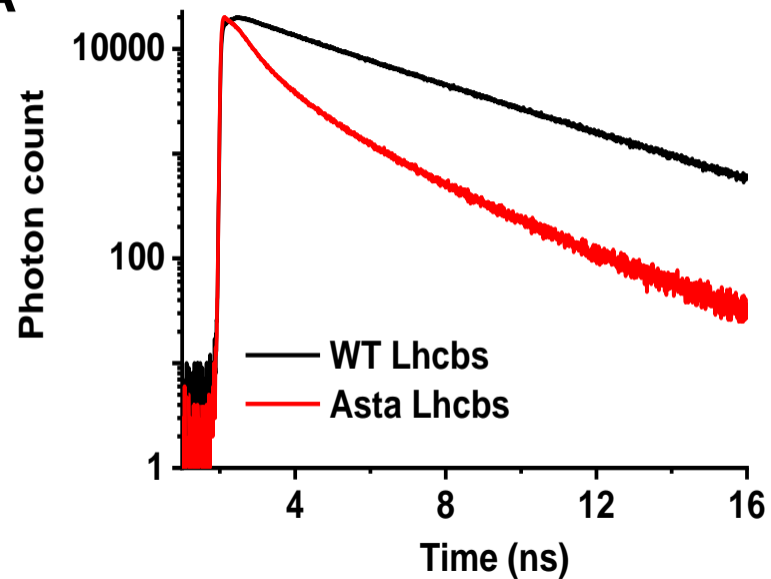**B**

| Samples    | $\tau$ 1 | Amp 1 | $\tau$ 2 | Amp 2 | $\tau$ 3 | Amp 3 | Life time (ns)  |
|------------|----------|-------|----------|-------|----------|-------|-----------------|
| WT Lhcbs   | 1.45     | 0.12  | 3.83     | 0.88  | —        | —     | $3.54 \pm 0.00$ |
| Asta Lhcbs | 0.34     | 0.54  | 1.03     | 0.33  | 2.70     | 0.13  | $0.87 \pm 0.00$ |

Supplement: supp [file elife-58984-supp-v1.zip › elife_poa_e58984_Figure_4_figure_supplement_2.pdf]

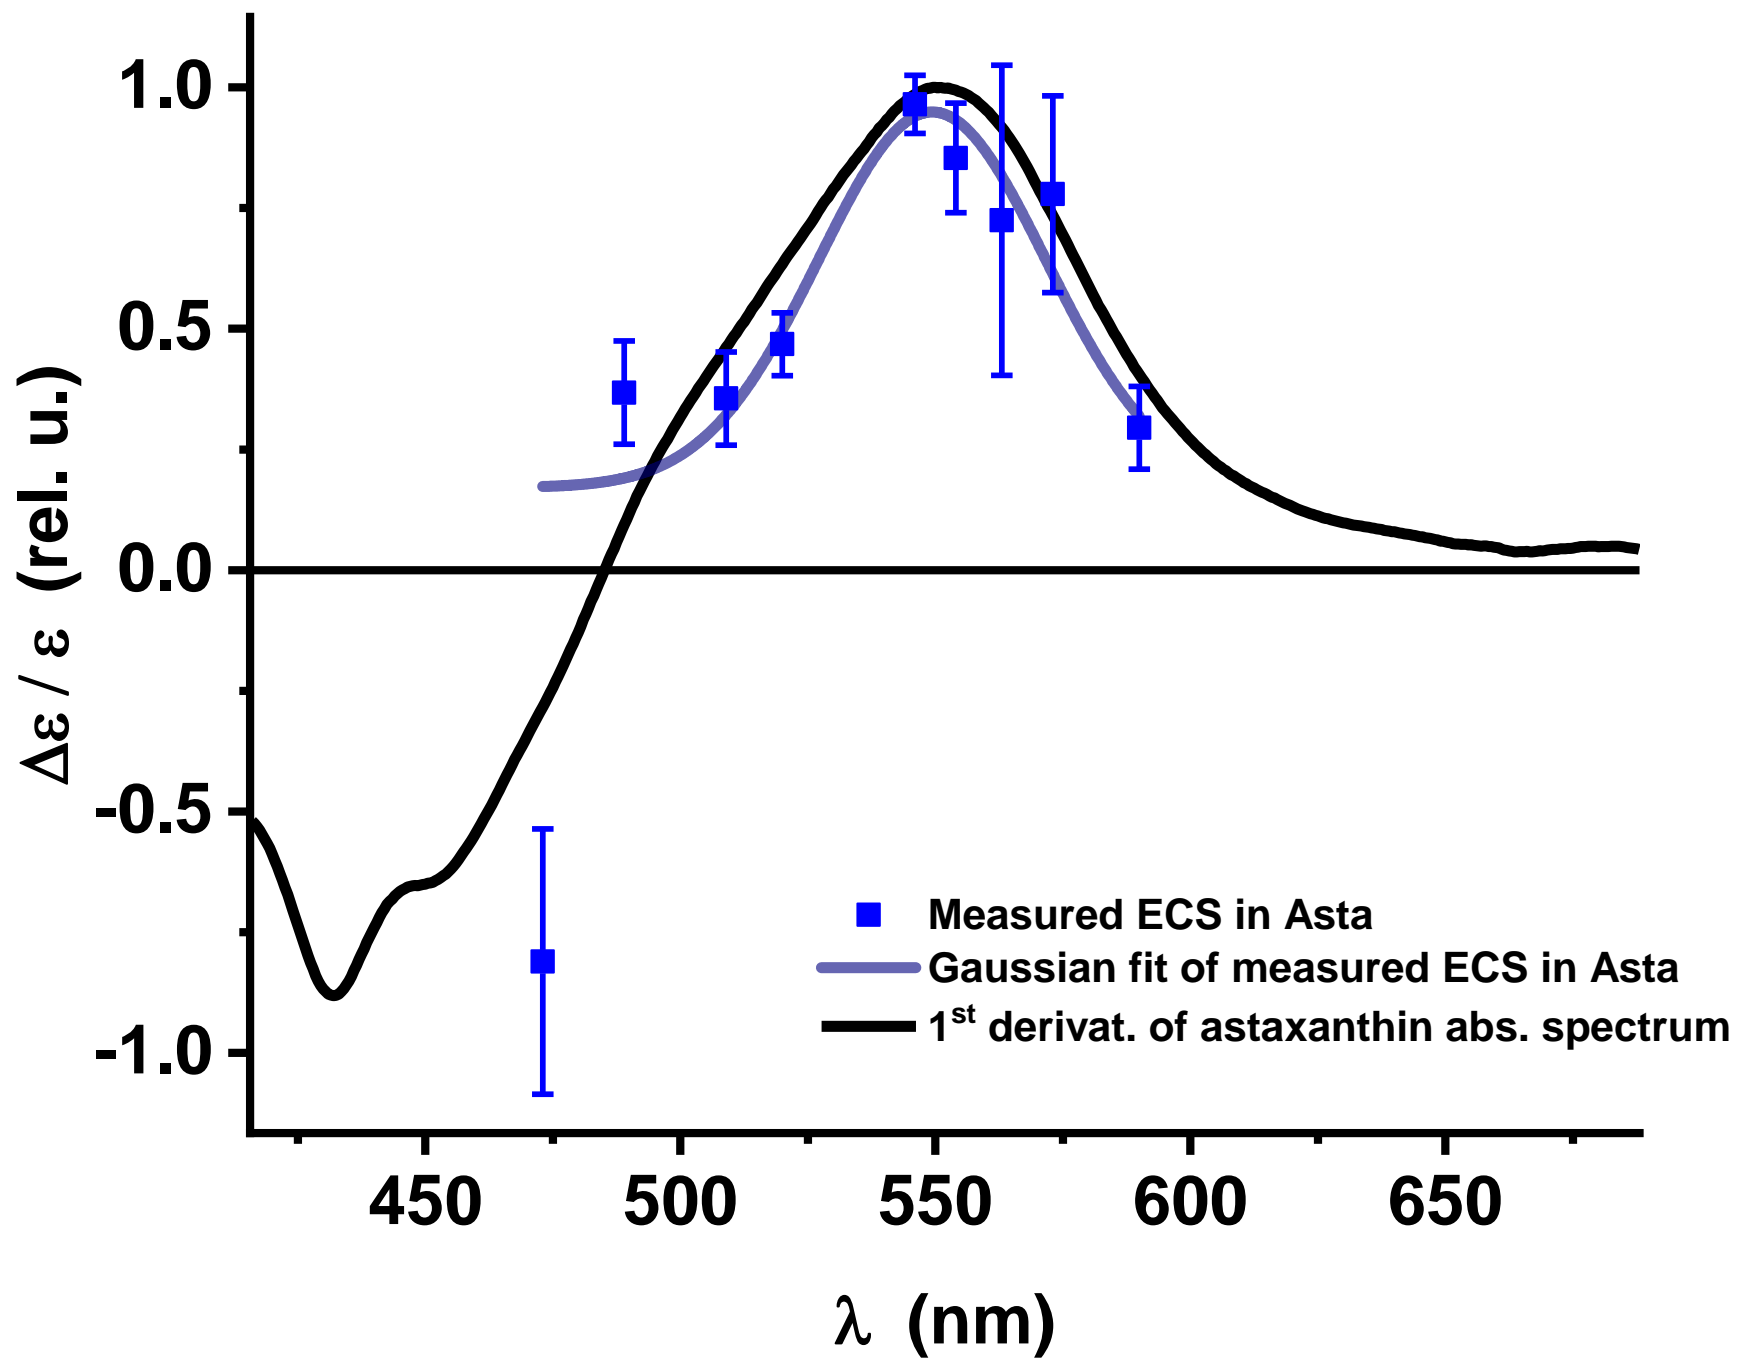

Supplement: supp [file elife-58984-supp-v1.zip › elife_poa_e58984_Figure_5_figure_supplement_1.pdf]

**A**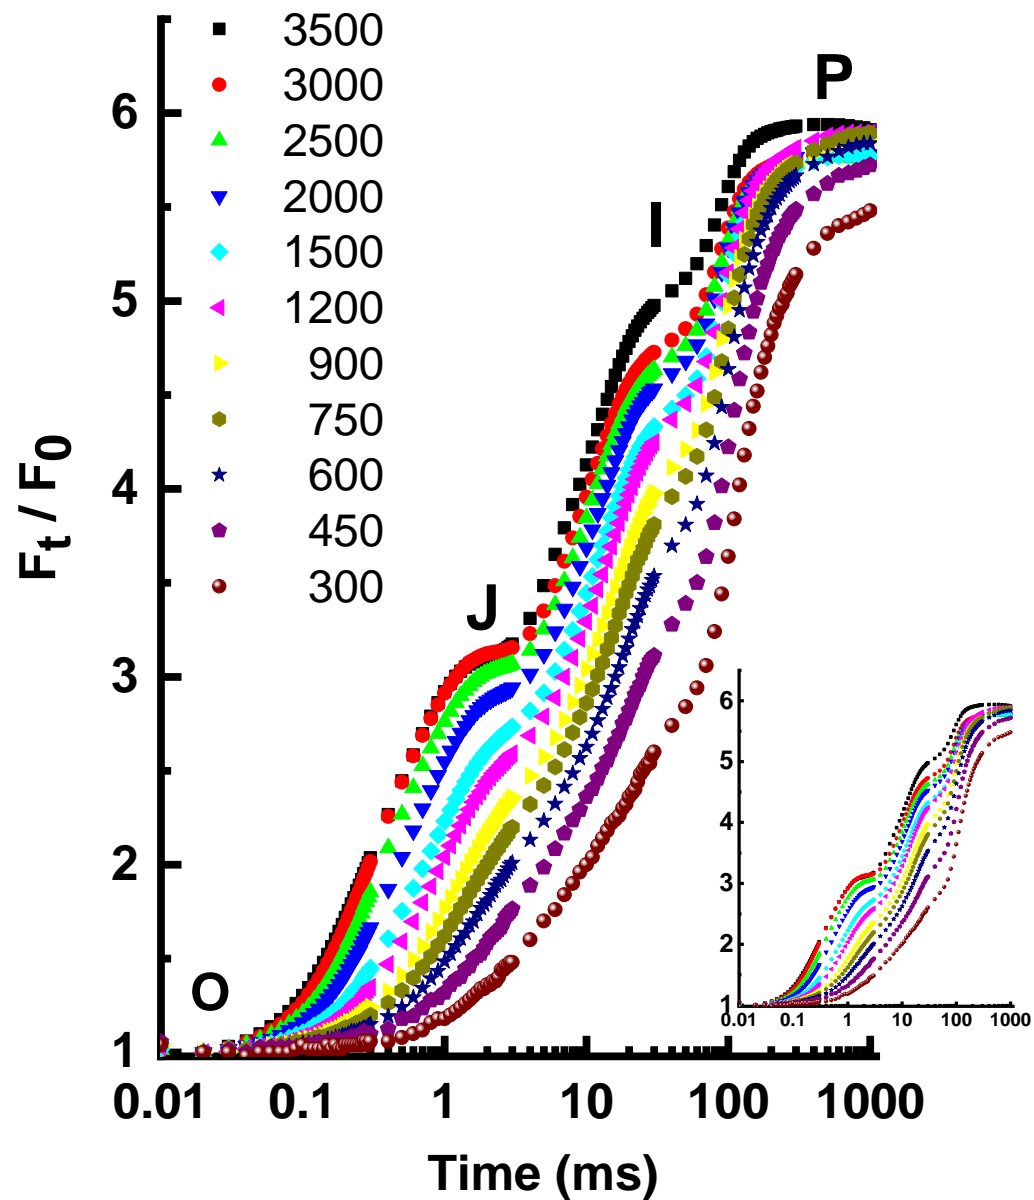**B**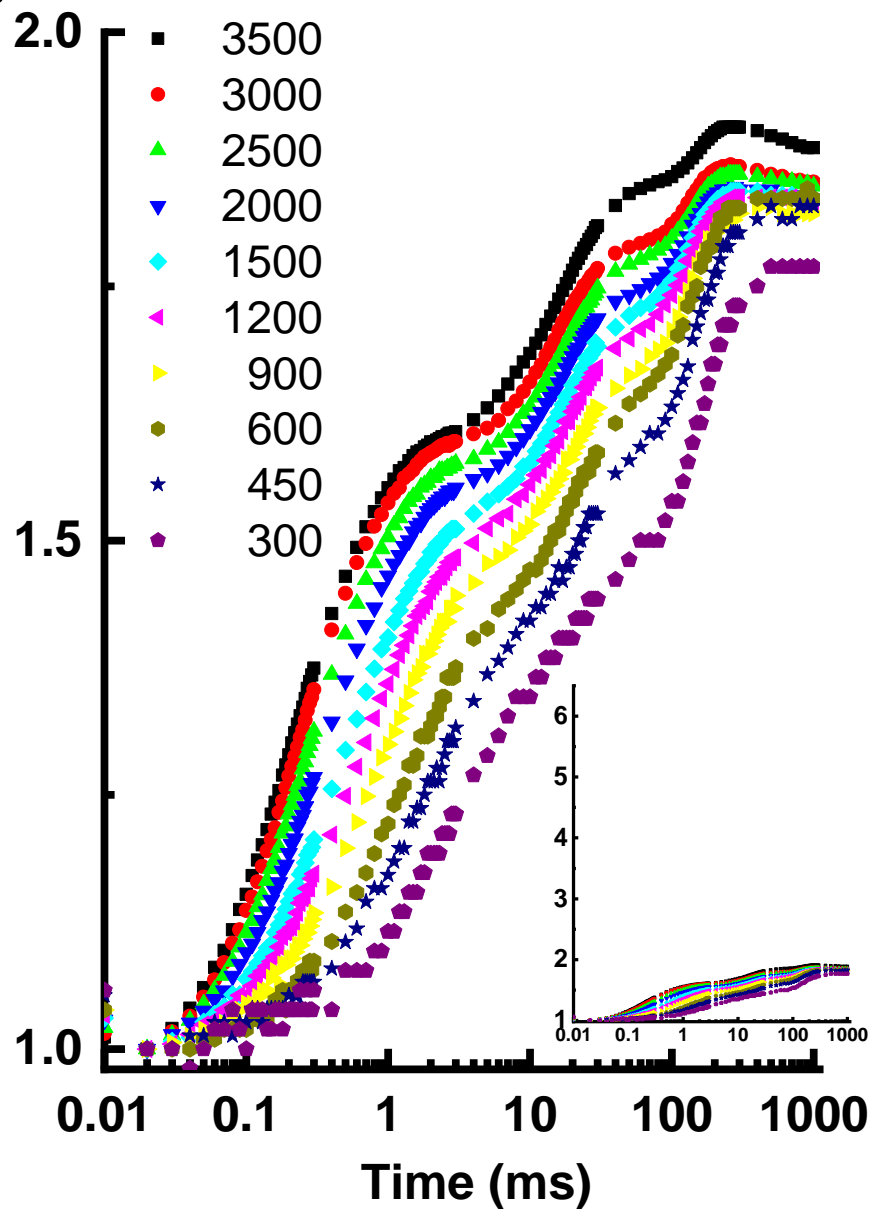

Supplement: supp [file elife-58984-supp-v1.zip › elife_poa_e58984_Figure_5_figure_supplement_2.pdf]

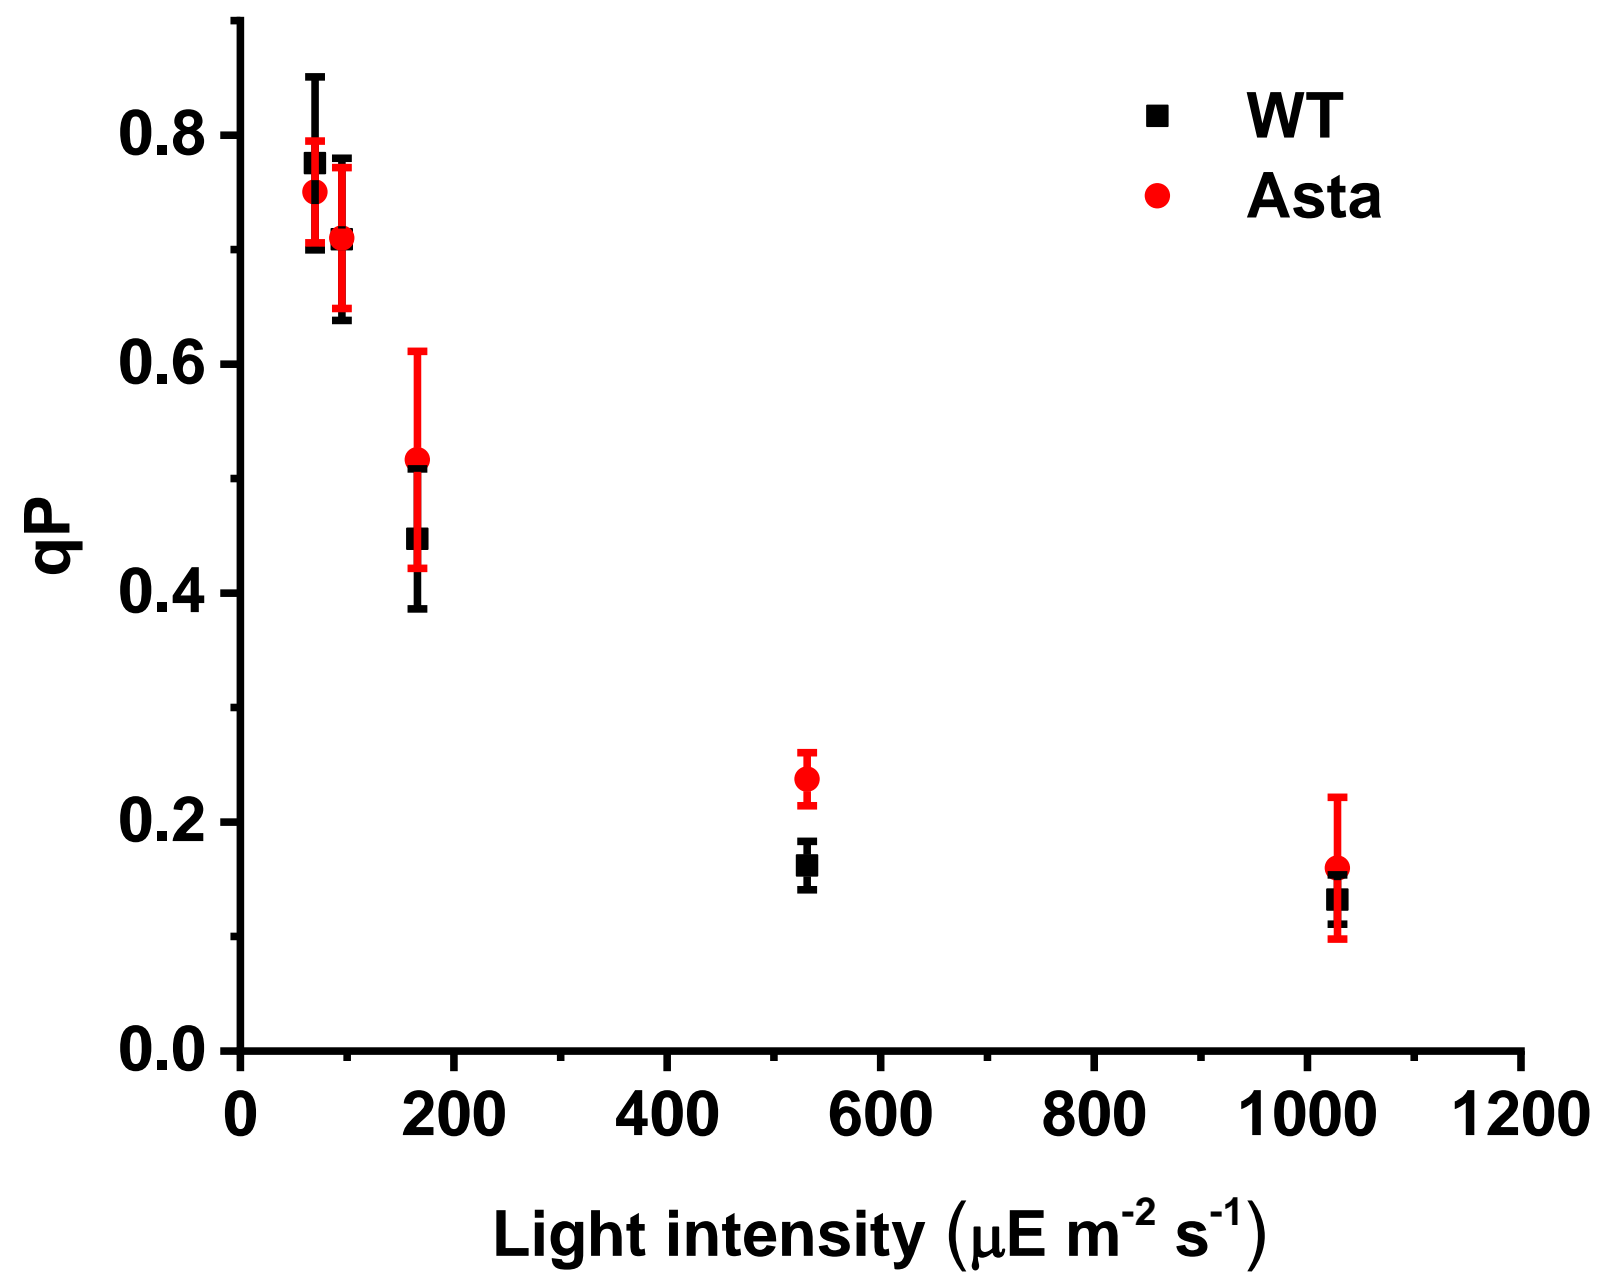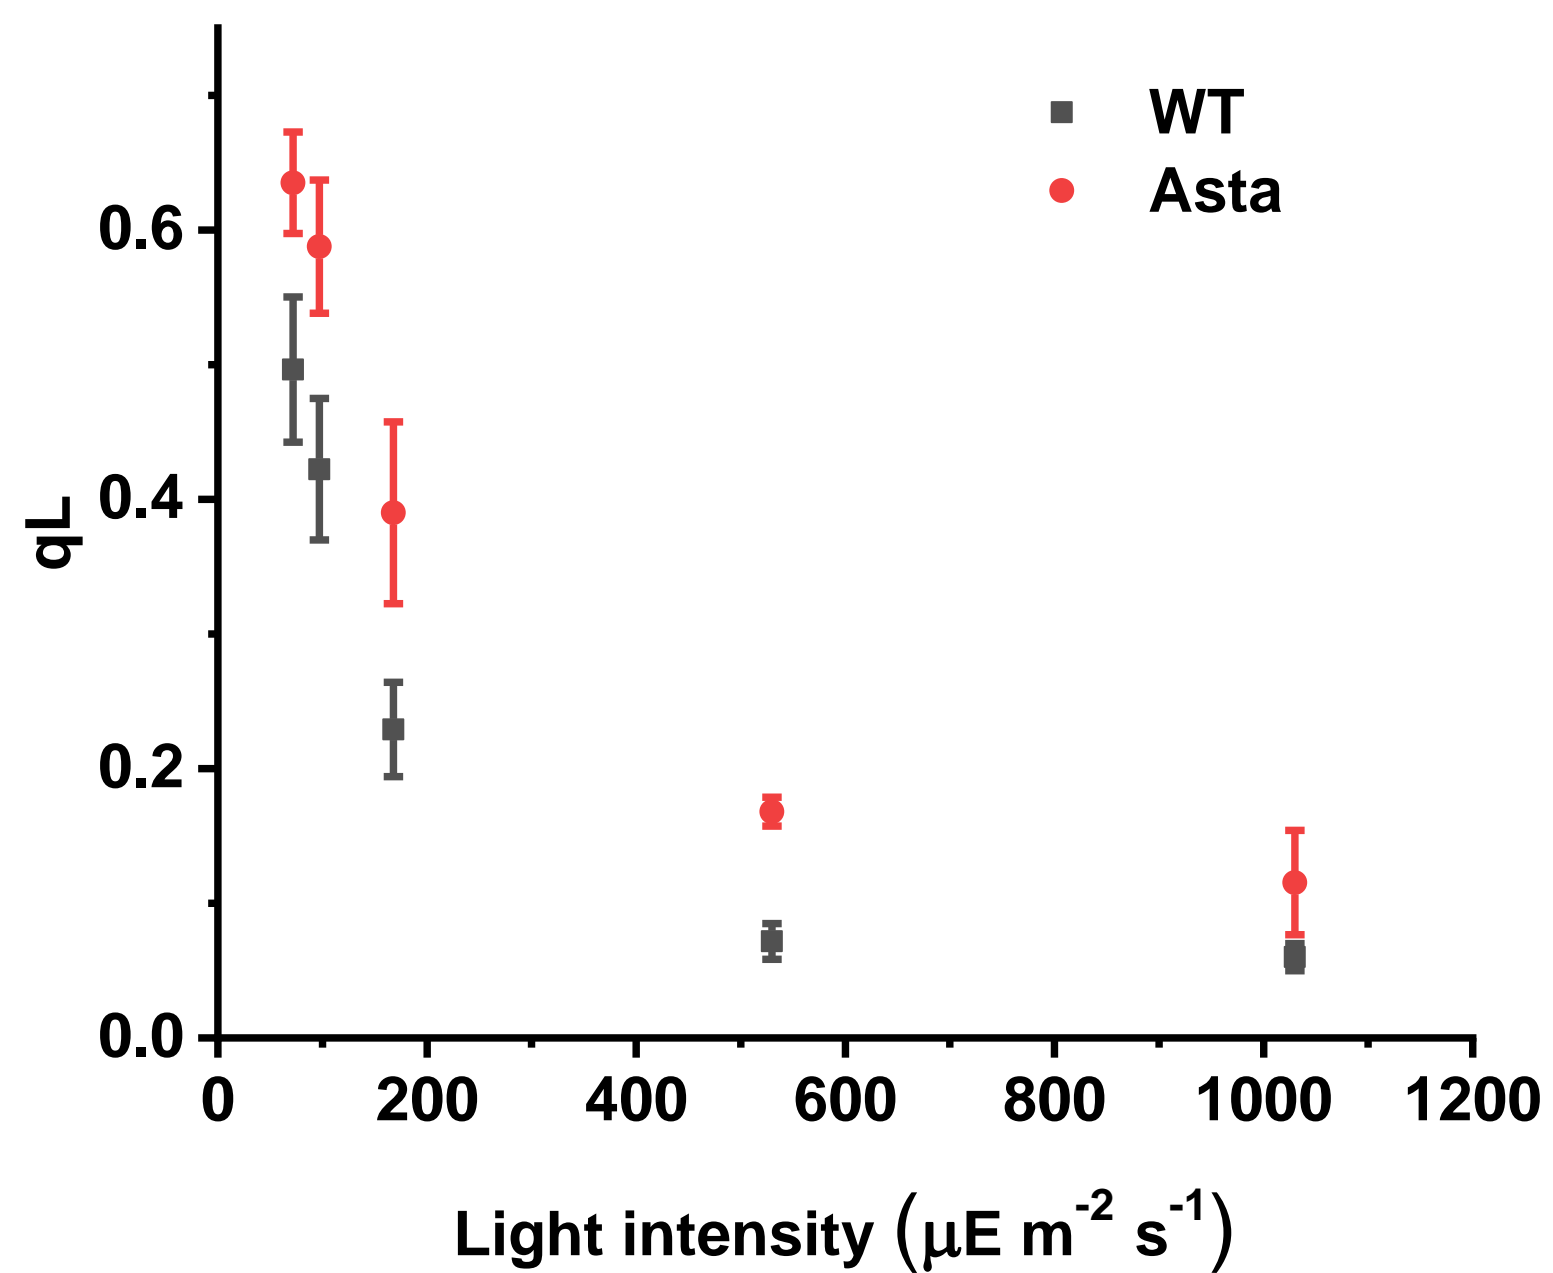

Supplement: supp [file elife-58984-supp-v1.zip › elife_poa_e58984_Figure_5_figure_supplement_3.pdf]

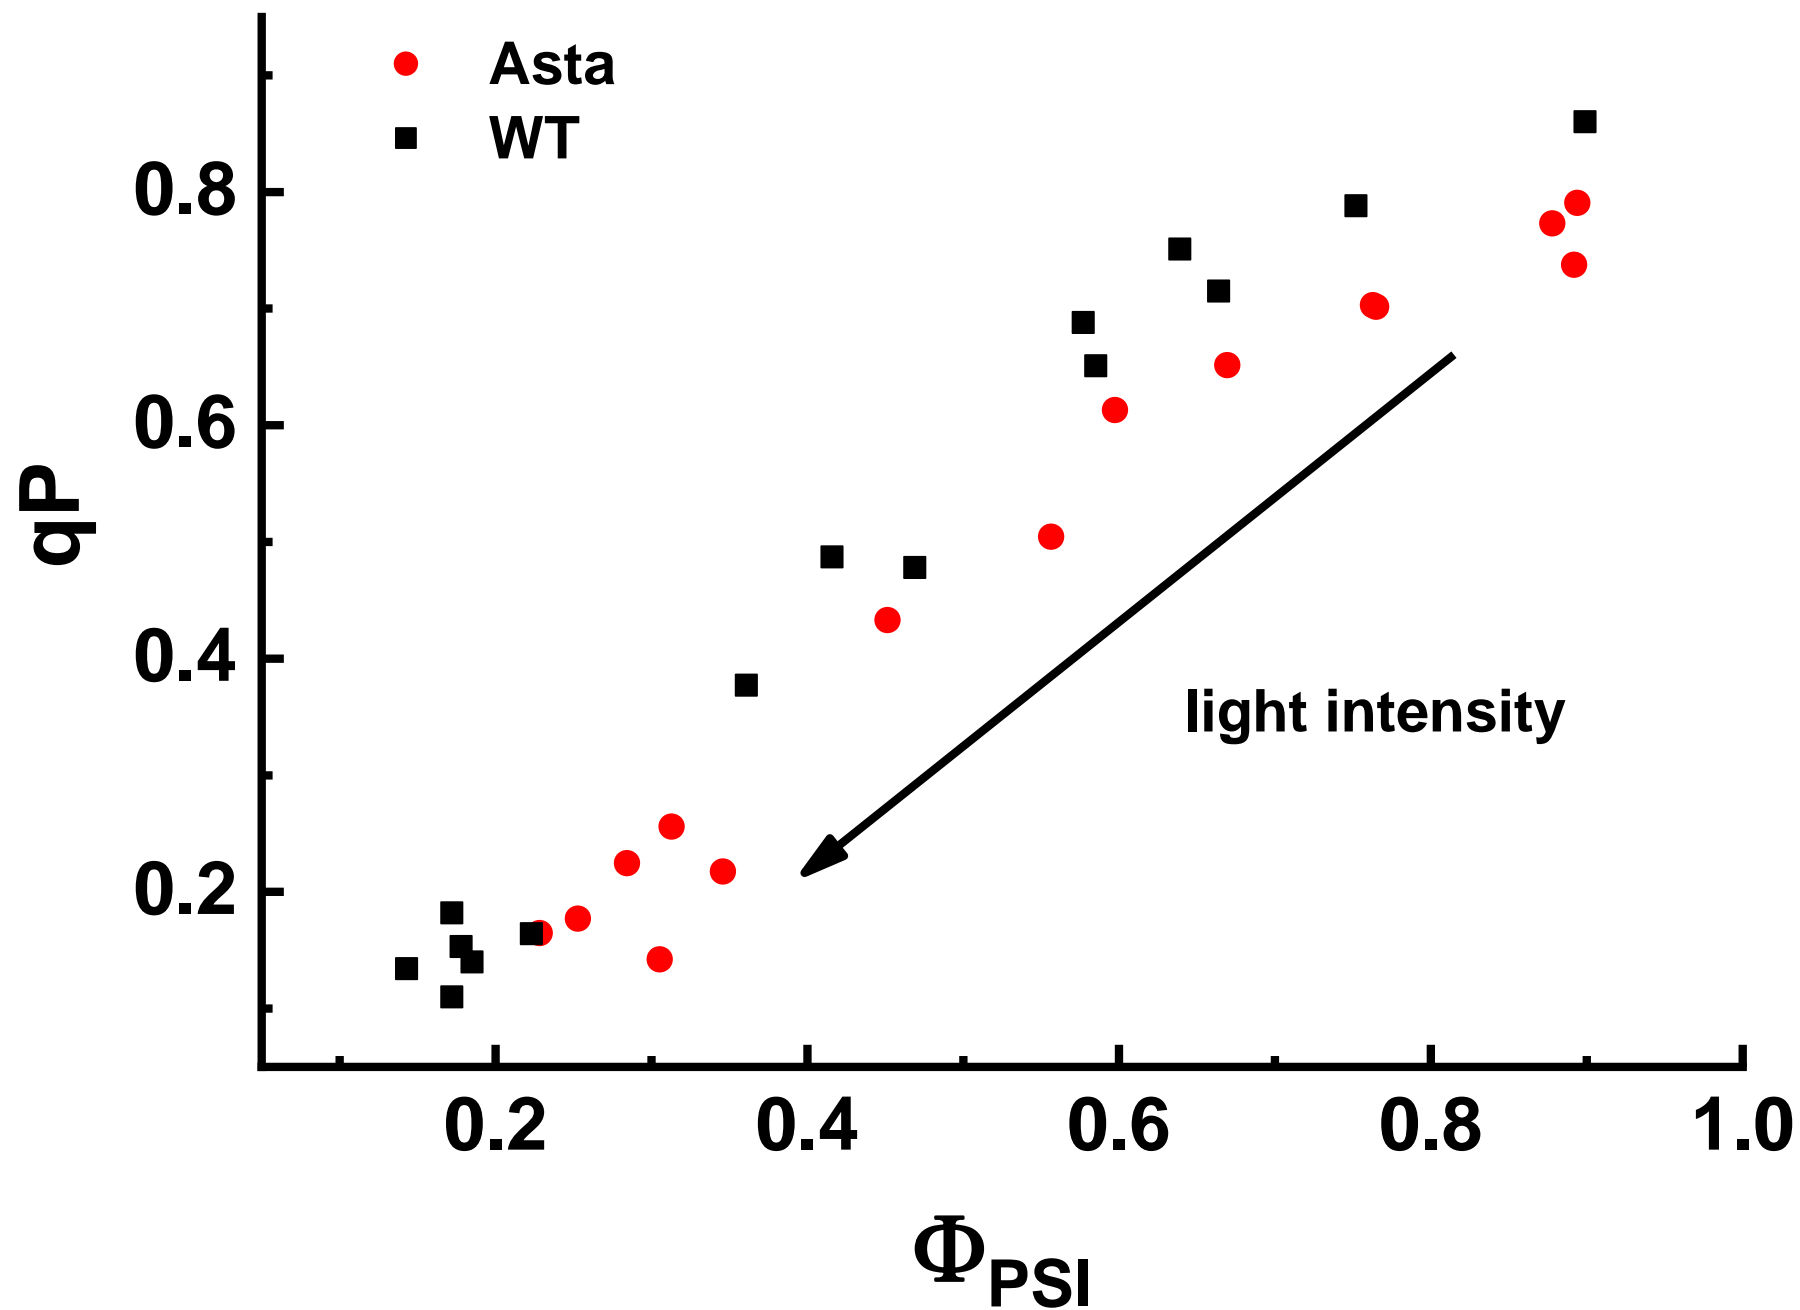

Supplement: supp [file elife-58984-supp-v1.zip › elife_poa_e58984_Figure_5_figure_supplement_4.pdf]

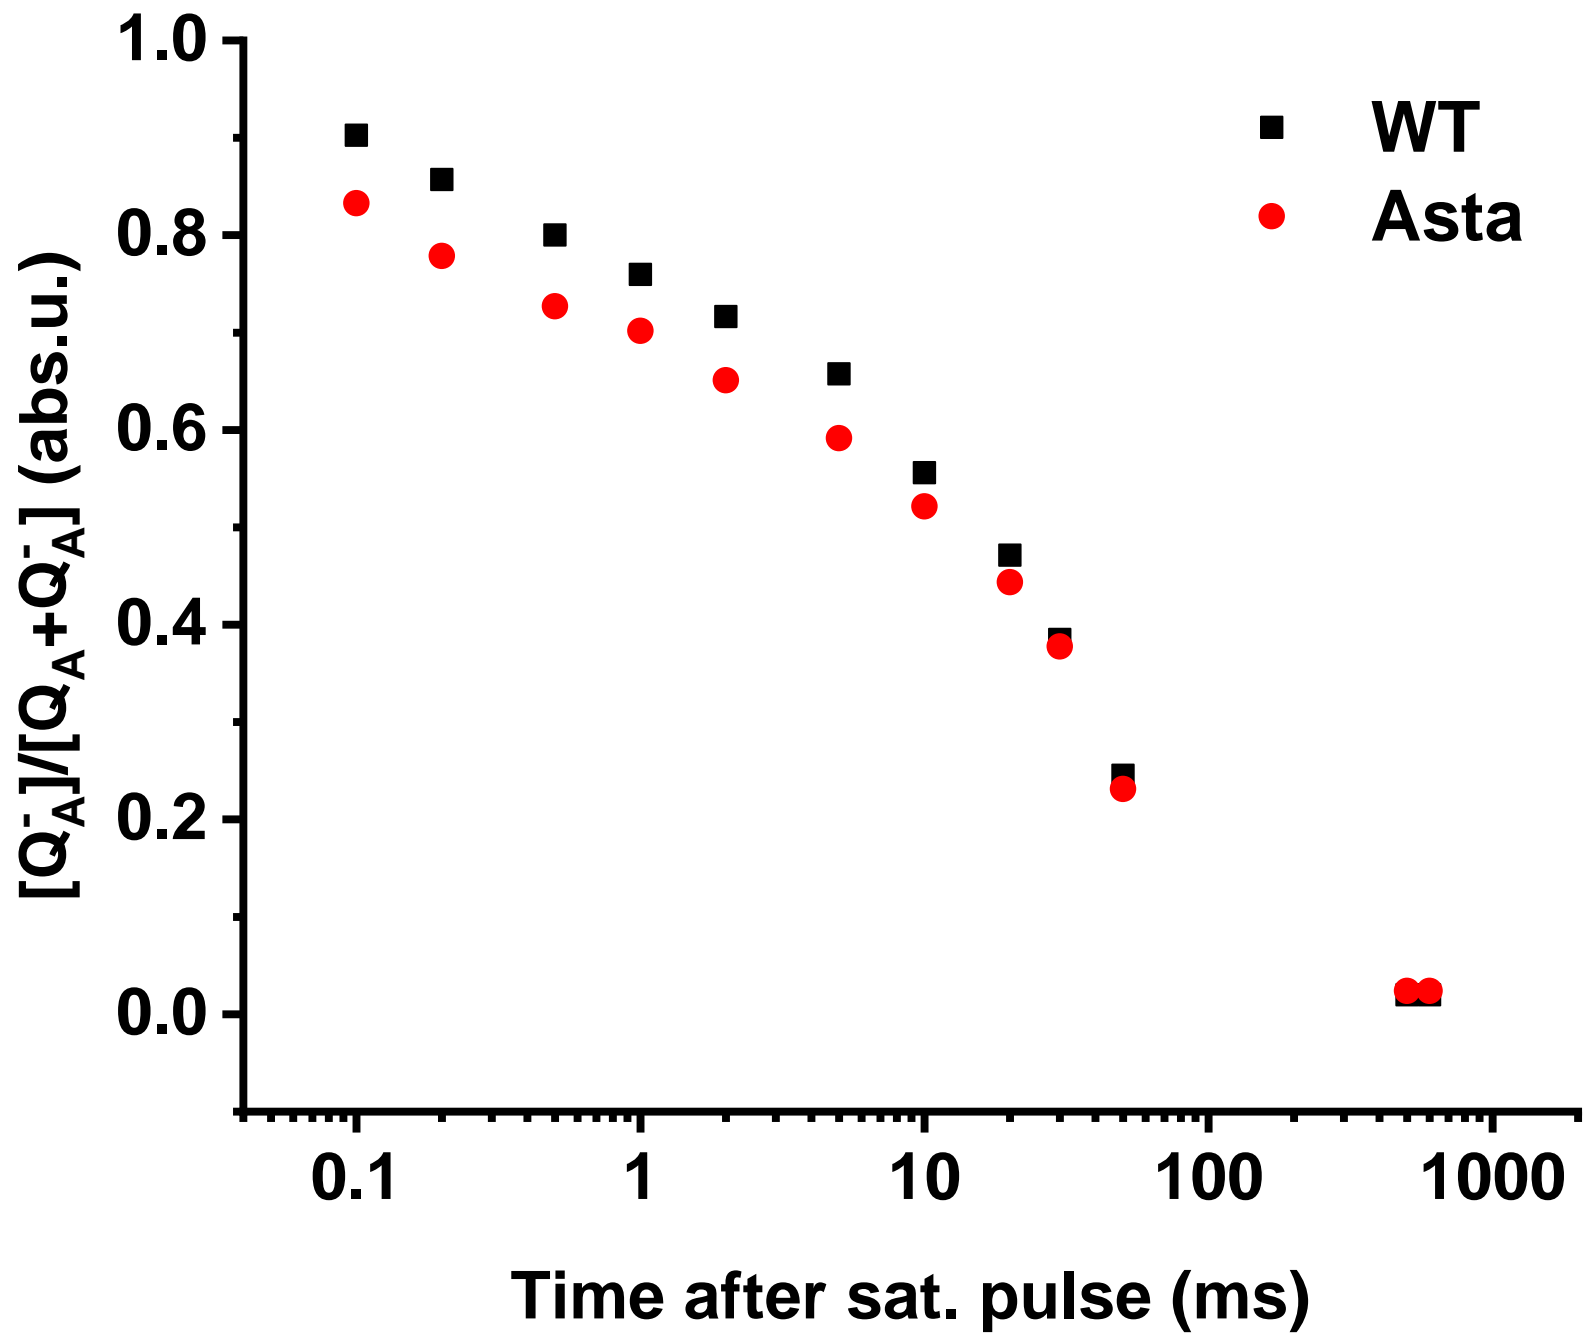

Supplement: supp [file elife-58984-supp-v1.zip › elife_poa_e58984_Figure_5_figure_supplement_5.pdf]

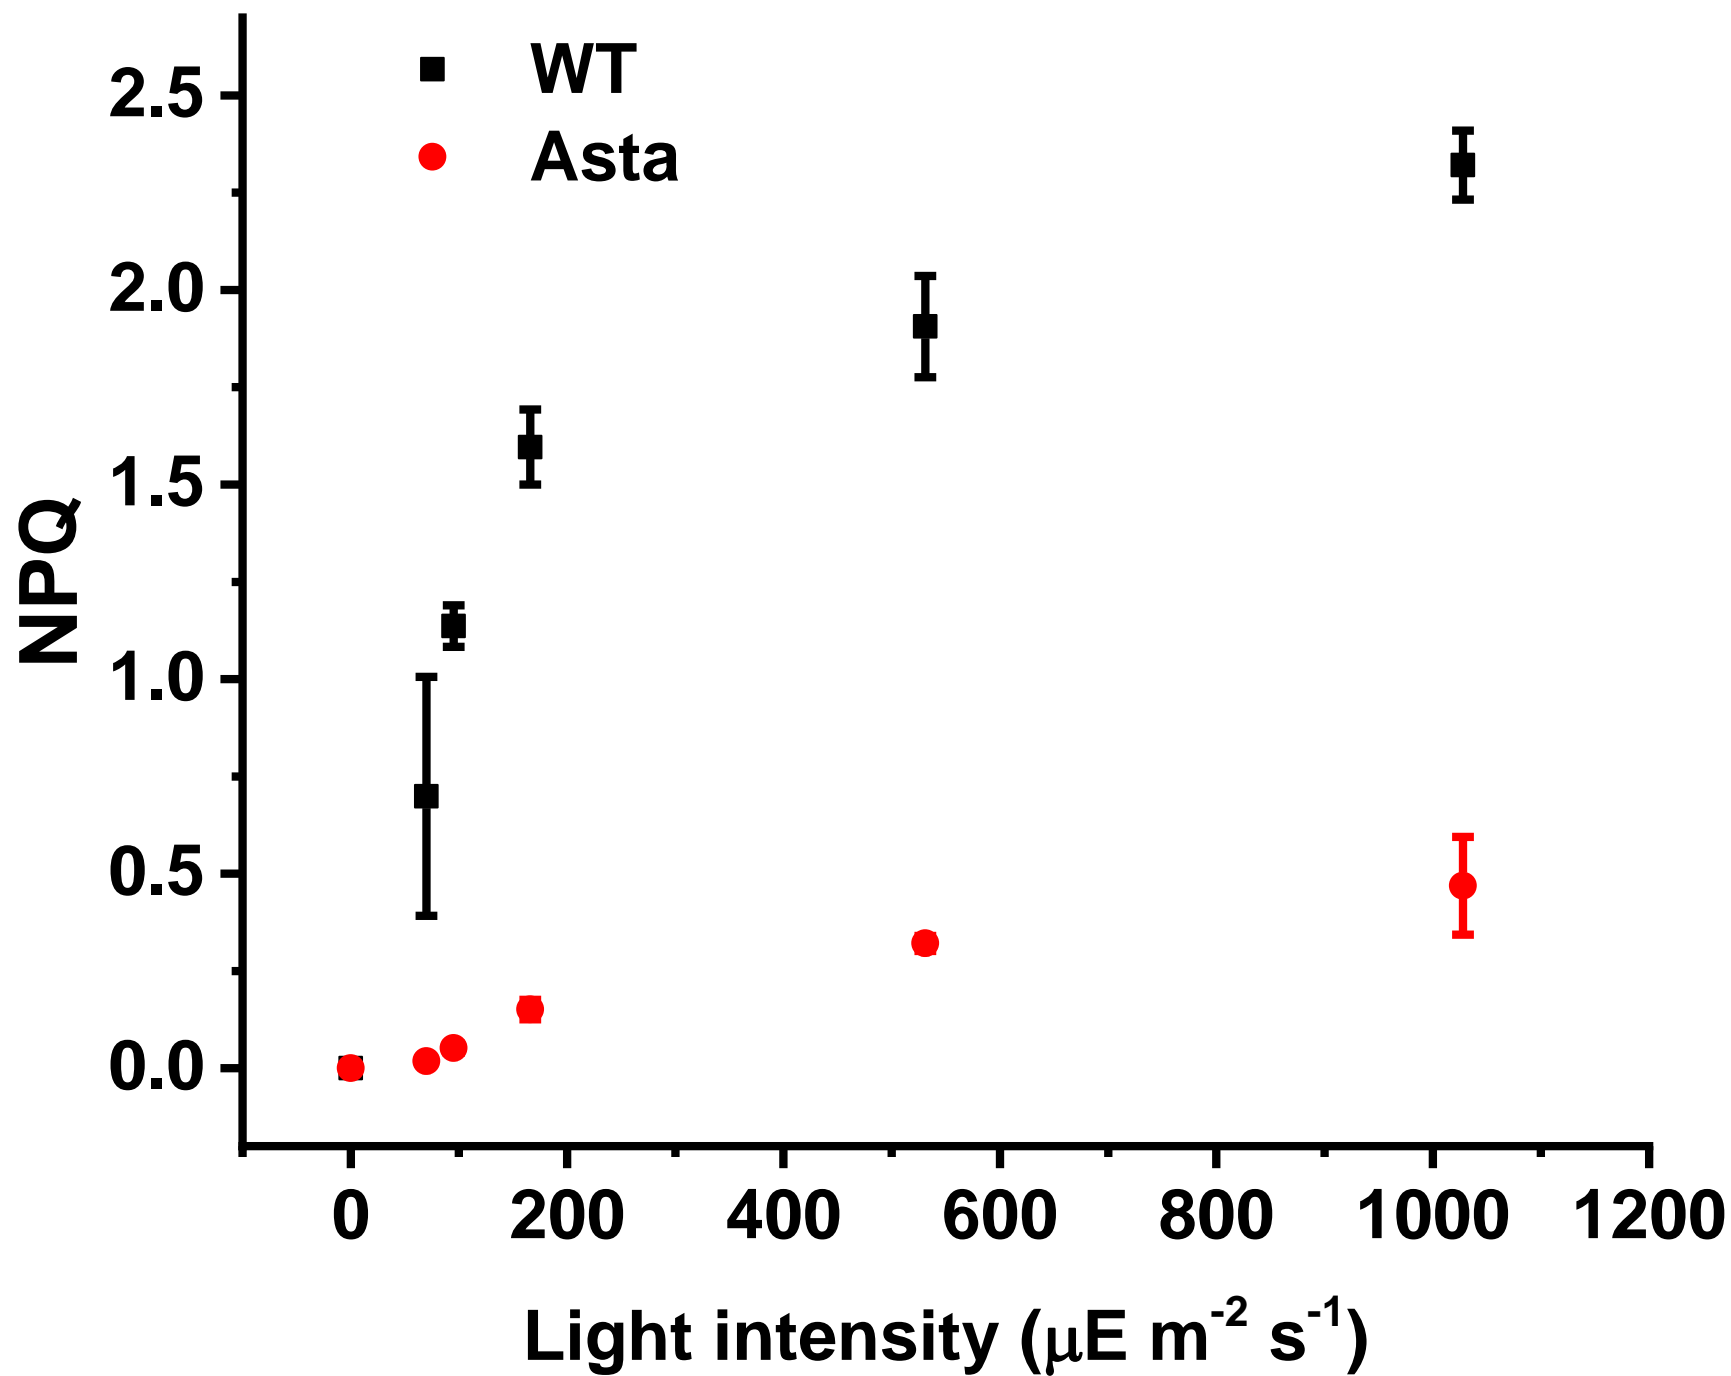

Supplement: supp [file elife-58984-supp-v1.zip › elife_poa_e58984_Figure_5_figure_supplement_6.pdf]

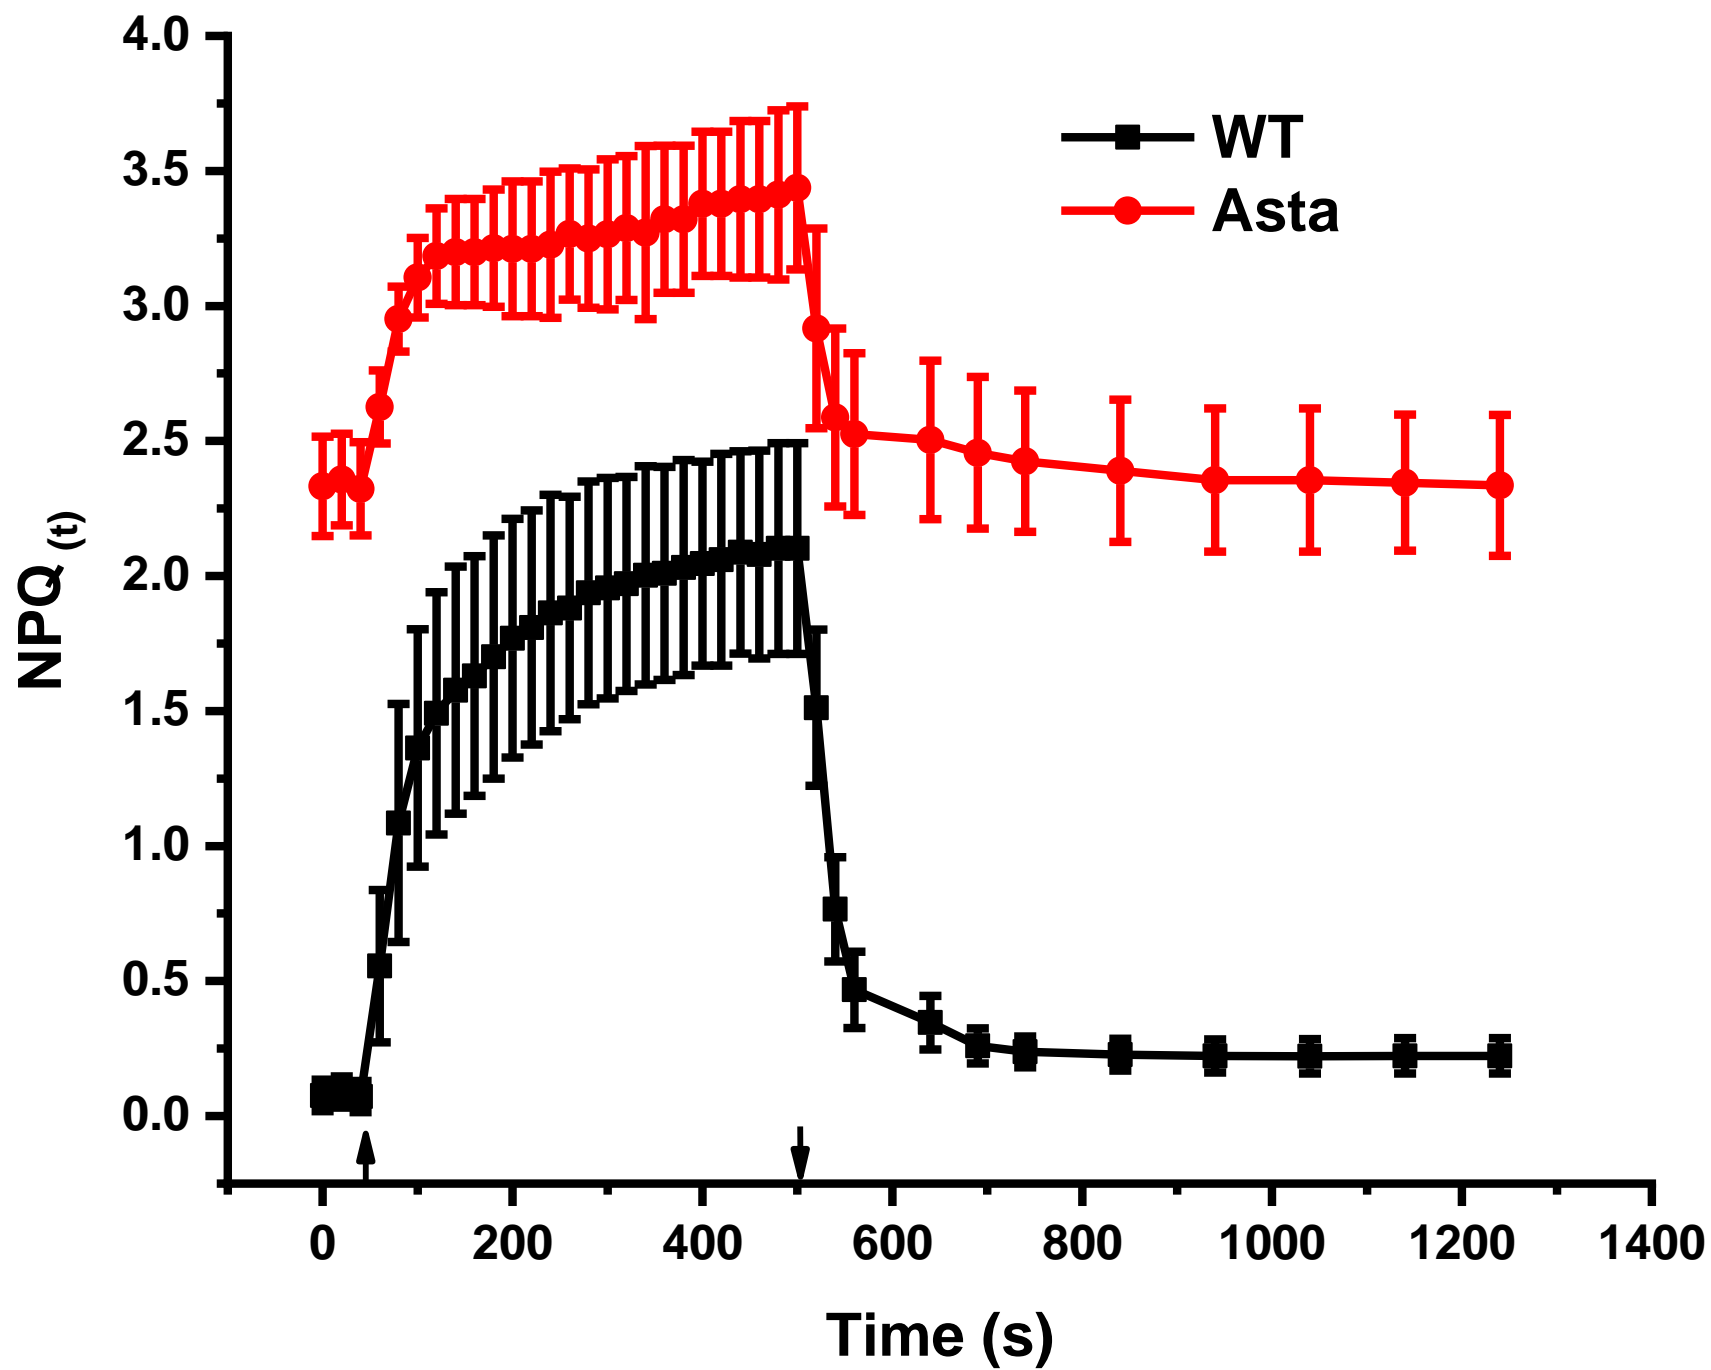

Supplement: supp [file elife-58984-supp-v1.zip › elife_poa_e58984_Figure_5_figure_supplement_7.pdf]
